# Supplementary material
Source: publisher figshare collection journal article supplement (https://gsajournals.figshare.com/ndownloader/files/16266707)
Supplement: Supplementary file 1 [file 16266707]

## Sheet: Supplemental Table 1
Gene Symbol	Gene Name	FlyBase Gene ID	Allele Name	Molecular Lesion (if known)	Stock Genotype	BDSC Stock #	Kyoto Stock #	Original Stock Name	Original Stock ID	Original Screen Data: ERG defect	Original Screen Data: Morphological Defect	Pex-Screen Results		Screen Result Codes
AMPKα	AMP-activated protein kinase α subunit	FBgn0023169	AMPKα[A]	p.S188L	y[1] AMPKα[A] w[*] P{ry[+t7.2]=neoFRT}19A / FM7c, P{w[+mC]=GAL4-Kr.C}DC1,P{w[+mC]=UAS-GFP.S65T}DC5, sn[+]	57049	116771	XE23A	XBSY158	Yes	No	No change		No change
AMPKα	AMP-activated protein kinase α subunit	FBgn0023169	AMPKα[F]	unidentified (mapped by complementation)	y[1] AMPKα[F] w[*] P{ry[+t7.2]=neoFRT}19A / FM7c, P{w[+mC]=GAL4-Kr.C}DC1,P{w[+mC]=UAS-GFP.S65T}DC5, sn[+]	N/A	116954	XE23F	XMHW164	Yes	No	No change		Category A Increase number
AP-1γ	Adaptor Protein complex 1, γ subunit	FBgn0030089	AP-1γ[B]	splice acceptor site	y[1] w[*] AP-1gamma[B] P{ry[+t7.2]=neoFRT}19A / FM7c, P{w[+mC]=GAL4-Kr.C}DC1,P{w[+mC]=UAS-GFP.S65T}DC5, sn[+]	57051	116803	XE09B	XFSY068	Yes	Yes	No change		Category B Enlargement
AP-1γ	Adaptor Protein complex 1, γ subunit	FBgn0030089	AP-1γ[D]	p.L133P	y[1] w[*] AP-1gamma[D] P{ry[+t7.2]=neoFRT}19A / FM7c, P{w[+mC]=GAL4-Kr.C}DC1,P{w[+mC]=UAS-GFP.S65T}DC5, sn[+]	57052	116869	XE09D	XJSY113	Yes	Yes	Inconsistent		Category C Decrease number
arm	armadillo	FBgn0000117	arm[A]	p.V144E	y[1] arm[A] w[*] P{ry[+t7.2]=neoFRT}19A / FM7c, P{w[+mC]=GAL4-Kr.C}DC1,P{w[+mC]=UAS-GFP.S65T}DC5, sn[+]	N/A	116583	XM30a	XDSY051	No (Cell lethal)	Yes	No change		Inconsistent
arm	armadillo	FBgn0000117	arm[B]	p.Q490X	y[1] arm[B] w[*] P{ry[+t7.2]=neoFRT}19A / FM7c, P{w[+mC]=GAL4-Kr.C}DC1,P{w[+mC]=UAS-GFP.S65T}DC5, sn[+]	N/A	116584	XM30B	XDSY130	No (Cell lethal)	Yes	No change
arm	armadillo	FBgn0000117	arm[H]	unidentified (mapped by complementation)	y[1] arm[H] w[*] P{ry[+t7.2]=neoFRT}19A / FM7c, P{w[+mC]=GAL4-Kr.C}DC1,P{w[+mC]=UAS-GFP.S65T}DC5, sn[+]	N/A	117055	XE52A	XEZK086	Yes	Yes	No change
ATP7	ATP7	FBgn0030343	ATP7[A]	p.V761D	y[1] w[*] ATP7[A] P{ry[+t7.2]=neoFRT}19A / FM7c, P{w[+mC]=GAL4-Kr.C}DC1,P{w[+mC]=UAS-GFP.S65T}DC5, sn[+]	N/A	116782	XP05A	XEMJ237	No	Yes	No change
ATP7	ATP7	FBgn0030343	ATP7[B]	p.G579R	y[1] w[*] ATP7[B] P{ry[+t7.2]=neoFRT}19A / FM7c, P{w[+mC]=GAL4-Kr.C}DC1,P{w[+mC]=UAS-GFP.S65T}DC5, sn[+]	57055	116794	XP05B	XEVB131	No	Yes	No change
baz	bazooka	FBgn0000163	baz[A]	p.Y302X	y[1] w[*] baz[A] P{ry[+t7.2]=neoFRT}19A / FM7c, P{w[+mC]=GAL4-Kr.C}DC1,P{w[+mC]=UAS-GFP.S65T}DC5, sn[+]	N/A	116590	XM25A	XEMJ169	No	Yes	No change
baz	bazooka	FBgn0000163	baz[B]	unidentified (mapped by complementation)	y[1] w[*] baz[B] P{ry[+t7.2]=neoFRT}19A / FM7c, P{w[+mC]=GAL4-Kr.C}DC1,P{w[+mC]=UAS-GFP.S65T}DC5, sn[+]	N/A	116666	XM25B	XJBX026	No	Yes	No change
ben	bendless	FBgn0000173	ben[A]	p.W129X	y[1] w[*] ben[A] P{ry[+t7.2]=neoFRT}19A / FM7c, P{w[+mC]=GAL4-Kr.C}DC1,P{w[+mC]=UAS-GFP.S65T}DC5, sn[+]	57057	117138	XE40A	XKCB053	Yes	Yes	No change
ben	bendless	FBgn0000173	ben[B]	p.P120L	y[1] w[*] ben[B] P{ry[+t7.2]=neoFRT}19A / FM7c, P{w[+mC]=GAL4-Kr.C}DC1,P{w[+mC]=UAS-GFP.S65T}DC5, sn[+]	57058	117143	XE40B	XKHW188	Yes	Yes	No change
br	broad	FBgn0283451	br[C]	unidentified (mapped by complementation)	y[1] br[C] w[*] P{ry[+t7.2]=neoFRT}19A / FM7c, P{w[+mC]=GAL4-Kr.C}DC1, P{w[+mC]=UAS-GFP.S65T}DC5, sn[+]	N/A	116662	XG01A	XIWL132	No (No eclosion)	Yes	No change
br	broad	FBgn0283451	br[XD]	p.D33N	y[1] br[XD] w[*] P{ry[+t7.2]=neoFRT}19A / FM7c, P{w[+mC]=GAL4-Kr.C}DC1,P{w[+mC]=UAS-GFP.S65T}DC5, sn[+]	N/A	116704	XG01B	XLCB002	No (Cell lethal)	Yes	No change
br	broad	FBgn0283451	br[A]	unidentified (mapped by complementation)	y[1] br[A] w[*] P{ry[+t7.2]=neoFRT}19A / FM7c, P{w[+mC]=GAL4-Kr.C}DC1, P{w[+mC]=UAS-GFP.S65T}DC5, sn[+]	52316	117068	XE27A	XGSY091	Yes	Yes	No change
br	broad	FBgn0283451	br[B]	p.C665R	y[1] br[B] w[*] P{ry[+t7.2]=neoFRT}19A / FM7c, P{w[+mC]=GAL4-Kr.C}DC1, P{w[+mC]=UAS-GFP.S65T}DC5, sn[+]	52317	117209	XE27B	XMMJ111	Yes	Yes	No change
br	broad	FBgn0283451	br[F]	unidentified (mapped by complementation)	y[1] br[F] w[*] P{ry[+t7.2]=neoFRT}19A / FM7c, P{w[+mC]=GAL4-Kr.C}DC1, P{w[+mC]=UAS-GFP.S65T}DC5, sn[+]	N/A	XISY075	XM08A	XISY075	No	Yes	No change
br	broad	FBgn0283451	br[G]	unidentified (mapped by complementation)	y[1] br[G] w[*] P{ry[+t7.2]=neoFRT}19A / FM7c, P{w[+mC]=GAL4-Kr.C}DC1, P{w[+mC]=UAS-GFP.S65T}DC5, sn[+]	N/A	XLMJ261	XM08B	XLMJ261	No	Yes	No change
cac	cacophony	FBgn0263111	cac[B]	unidentified (mapped by complementation)	y[1] w[*] cac[B] P{ry[+t7.2]=neoFRT}19A / FM7c, P{w[+mC]=GAL4-Kr.C}DC1,P{w[+mC]=UAS-GFP.S65T}DC5, sn[+]	N/A	116790	XE06B	XESY146	Yes	No	No change
cac	cacophony	FBgn0263111	cac[I]	unidentified (mapped by complementation)	y[1] w[*] cac[I] P{ry[+t7.2]=neoFRT}19A / FM7c, P{w[+mC]=GAL4-Kr.C}DC1, P{w[+mC]=UAS-GFP.S65T}DC5, sn[+]	N/A	116941	XE06I	XLYF052	Yes	No	No change
CDC45L	CDC45L	FBgn0026143	CDC45L[A]	p.Q540X	y[1] CDC45L[A] w[*] P{ry[+t7.2]=neoFRT}19A / FM7c, P{w[+mC]=GAL4-Kr.C}DC1,P{w[+mC]=UAS-GFP.S65T}DC5, sn[+]	52318	116592	XM07A	XEMJ180	No (Cell lethal)	Yes	Inconsistent
Cdk7	Cyclin-dependent kinase 7	FBgn0263237	Cdk7[D]	p.T228S	y[1] w[*] Cdk7[D] P{ry[+t7.2]=neoFRT}19A / FM7c, P{w[+mC]=GAL4-Kr.C}DC1,P{w[+mC]=UAS-GFP.S65T}DC5, sn[+]	N/A	116640	XM19A	XHYF075	No (Cell lethal)	Yes	No change
Cdk7	Cyclin-dependent kinase 7	FBgn0263237	Cdk7[B]	p.G200D	y[1] w[*] Cdk7[B] P{ry[+t7.2]=neoFRT}19A / FM7c, P{w[+mC]=GAL4-Kr.C}DC1,P{w[+mC]=UAS-GFP.S65T}DC5, sn[+]	N/A	116752	XM19B	XMMJ160	No (Cell lethal)	Yes	No change
Cdk7	Cyclin-dependent kinase 7	FBgn0263237	Cdk7[A]	p.E68K	y[1] w[*] Cdk7[A] P{ry[+t7.2]=neoFRT}19A / FM7c, P{w[+mC]=GAL4-Kr.C}DC1,P{w[+mC]=UAS-GFP.S65T}DC5, sn[+]	57067	116919	XE19A	XLCB012	Yes	Yes	No change
CG13365		FBgn0029529	CG13365[A]	p.V47D	y[1] CG13365[A] w[*] P{ry[+t7.2]=neoFRT}19A / FM7c, P{w[+mC]=GAL4-Kr.C}DC1,P{w[+mC]=UAS-GFP.S65T}DC5, sn[+]	52322	117075	XE25A	XGZK055	Yes	No	No change
CG13365		FBgn0029529	CG13365[B]	unidentified (mapped by complementation)	y[1] CG13365[B] w[*] P{ry[+t7.2]=neoFRT}19A / FM7c, P{w[+mC]=GAL4-Kr.C}DC1,P{w[+mC]=UAS-GFP.S65T}DC5, sn[+]	52323	117084	XE25B	XHYF038	Yes	Yes	No change
CG14442		FBgn0029893	CG14442[B]	unidentified (mapped by complementation)	y[1] w[*] CG14442[B] P{ry[+t7.2]=neoFRT}19A / FM7c, P{w[+mC]=GAL4-Kr.C}DC1,P{w[+mC]=UAS-GFP.S65T}DC5, sn[+]	N/A	117152	XE48B	XKSY101	Yes	Yes	No change
CG14442		FBgn0029893	CG14442[A]	p.T755P	y[1] w[*] CG14442[A] P{ry[+t7.2]=neoFRT}19A / FM7c, P{w[+mC]=GAL4-Kr.C}DC1,P{w[+mC]=UAS-GFP.S65T}DC5, sn[+]	N/A (lost)	N/A (lost)	XE48A	XKHW124	Yes	Yes	No change
CG17829		FBgn0025635	CG17829[A]	p.W137X	y[1] CG17829[A] w[*] P{ry[+t7.2]=neoFRT}19A / FM7c, P{w[+mC]=GAL4-Kr.C}DC1,P{w[+mC]=UAS-GFP.S65T}DC5, sn[+]	N/A	116693	XM09A	XKSY010	No	Yes	Category A Increase number
CG17829		FBgn0025635	CG17829[B]	p.H253R	y[1] CG17829[B] w[*] P{ry[+t7.2]=neoFRT}19A / FM7c, P{w[+mC]=GAL4-Kr.C}DC1,P{w[+mC]=UAS-GFP.S65T}DC5, sn[+]	57074	116697	XM09B	XKYF102	No	Yes	Category A Increase number
CG2918		FBgn0023529	CG2918[D]	unidentified (mapped by complementation)	y[1] CG2918[D] w[*] P{ry[+t7.2]=neoFRT}19A / FM7c, P{w[+mC]=GAL4-Kr.C}DC1,P{w[+mC]=UAS-GFP.S65T}DC5, sn[+]	N/A	116728	XM10.2D	XLSY123	No (Cell lethal)	Yes	No change
CG3149		FBgn0027564	CG3149[A]	p.W535X	y[1] w[*] CG3149[A] P{ry[+t7.2]=neoFRT}19A / FM7c, P{w[+mC]=GAL4-Kr.C}DC1,P{w[+mC]=UAS-GFP.S65T}DC5, sn[+]	52330	116568	XM34A	XASY010	No (Cell lethal)	Yes	No change
CG3149		FBgn0027564	CG3149[B]	p.A410V	y[1] w[*] CG3149[B] P{ry[+t7.2]=neoFRT}19A / FM7c, P{w[+mC]=GAL4-Kr.C}DC1,P{w[+mC]=UAS-GFP.S65T}DC5, sn[+]	54258	116676	XM34B	XJSY154	No (Cell lethal)	Yes	Category A Increase number
CG32694		FBgn0052694	CG32694[C]	p.Q91X	y[1] w[*] CG32694[C] P{ry[+t7.2]=neoFRT}19A / FM7c, P{w[+mC]=GAL4-Kr.C}DC1,P{w[+mC]=UAS-GFP.S65T}DC5, sn[+]	N/A	116880	XE02C	XKHW062	Yes	No	No change
CG32694		FBgn0052694	CG32694[B]	splice acceptor site	y[1] w[*] CG32694[B] P{ry[+t7.2]=neoFRT}19A / FM7c, P{w[+mC]=GAL4-Kr.C}DC1,P{w[+mC]=UAS-GFP.S65T}DC5, sn[+]	N/A (lost)	N/A (lost)	XE02B	XHZK013	Yes	No	No change
CG32795		FBgn0040384	CG32795[A]	p.A196V	y[1] CG32795[A] w[*] P{ry[+t7.2]=neoFRT}19A / FM7c, P{w[+mC]=GAL4-Kr.C}DC1,P{w[+mC]=UAS-GFP.S65T}DC5, sn[+]	57079	116830	XG07A	XHSY016	No	Yes	Inconsistent
CG32795		FBgn0040384	CG32795[B]	unidentified (mapped by complementation)	y[1] CG32795[B] w[*] P{ry[+t7.2]=neoFRT}19A / FM7c, P{w[+mC]=GAL4-Kr.C}DC1,P{w[+mC]=UAS-GFP.S65T}DC5, sn[+]	N/A	116855	XG07B	XIZK001	No	Yes	Inconsistent
CG34401		FBgn0085430	CG34401[D]	p.V193E	y[1] w[*] CG34401[D] P{ry[+t7.2]=neoFRT}19A / FM7c, P{w[+mC]=GAL4-Kr.C}DC1, P{w[+mC]=UAS-GFP.S65T}DC5, sn[+]	N/A	117099	XE65A	XISY161	Yes	No	No change
CG4078		FBgn0029798	CG4078[B]	p.V11E	y[1] w[*] CG4078[B] P{ry[+t7.2]=neoFRT}19A / FM7c, P{w[+mC]=GAL4-Kr.C}DC1,P{w[+mC]=UAS-GFP.S65T}DC5, sn[+]	64462	116624	XM18B	XGZK056	No (Cell lethal)	Yes	No change
CG4407		FBgn0030431	CG4407[B]	p.V205G	y[1] w[*] CG4407[B] P{ry[+t7.2]=neoFRT}19A / FM7c, P{w[+mC]=GAL4-Kr.C}DC1,P{w[+mC]=UAS-GFP.S65T}DC5, sn[+]	N/A	116928	XE13B	XLSY024	Yes	No	No change
CG6891		FBgn0030955	CG6891[A]	p.T42S	y[1] w[*] CG6891[A] P{ry[+t7.2]=neoFRT}19A / FM7c, P{w[+mC]=GAL4-Kr.C}DC1, P{w[+mC]=UAS-GFP.S65T}DC5, sn[+]	N/A	117021	XE42A	XAMJ109	Yes	No	No change
CG7065		FBgn0030091	CG7065[B]	p.K327X	y[1] w[*] CG7065[B] P{ry[+t7.2]=neoFRT}19A / FM7c, P{w[+mC]=GAL4-Kr.C}DC1,P{w[+mC]=UAS-GFP.S65T}DC5, sn[+]	N/A	116812	XE11B	XGSY100	Yes	No	No change
CG7065		FBgn0030091	CG7065[A]	p.Q333X	y[1] w[*] CG7065[A] P{ry[+t7.2]=neoFRT}19A / FM7c, P{w[+mC]=GAL4-Kr.C}DC1,P{w[+mC]=UAS-GFP.S65T}DC5, sn[+]	52342	116921	XE11A	XLHW017	Yes	No	No change
CKIlβ	Casein kinase II β subunit	FBgn0000259	CKIlβ[D]	unidentified (mapped by complementation)	y[1] w[*] CKIIβ[D] P{ry[+t7.2]=neoFRT}19A / FM7c, P{w[+mC]=GAL4-Kr.C}DC1,P{w[+mC]=UAS-GFP.S65T}DC5, sn[+]	N/A	116730	XM02d	XLWL147	No (Cell lethal)	Yes	No change
CKIα	Casein kinase Iα	FBgn0015024	CKIα[B]	p.G148S	y[1] w[*] CkIα[B] P{ry[+t7.2]=neoFRT}19A / FM7c, P{w[+mC]=GAL4-Kr.C}DC1,P{w[+mC]=UAS-GFP.S65T}DC5, sn[+]	64459	116839	XG08B	XHZK052	No (Cell lethal)	Yes	No change
CKlIβ	Casein kinase II β subunit	FBgn0000259	CKIlβ[A]	deletion	y[1] w[*] CKIIβ[A] P{ry[+t7.2]=neoFRT}19A / FM7c, P{w[+mC]=GAL4-Kr.C}DC1,P{w[+mC]=UAS-GFP.S65T}DC5, sn[+]	N/A	116591	XM02A	XEMJ174	No (Cell lethal)	Yes	Inconsistent
Coq7	Coenzyme Q7	FBgn0029502	Coq7[B]	p.W90X	y[1] w[*] Coq7[B] P{ry[+t7.2]=neoFRT}19A / FM7c, P{w[+mC]=GAL4-Kr.C}DC1,P{w[+mC]=UAS-GFP.S65T}DC5, sn[+]	52345	117198	XE44B	XMAJ146	Yes	Yes	Category A Increase number
Coq7	Coenzyme Q7	FBgn0029502	Coq7[C]	p.Q158X	y[1] w[*] Coq7[C] P{ry[+t7.2]=neoFRT}19A / FM7c, P{w[+mC]=GAL4-Kr.C}DC1,P{w[+mC]=UAS-GFP.S65T}DC5, sn[+]	N/A	117204	XE44C	XMHW023	Yes	Yes	No change
Coq8	Coenzyme Q8	FBgn0052649	Coq8[A]	p.E623K	y[1] w[*] Coq8[A] P{ry[+t7.2]=neoFRT}19A / FM7c, P{w[+mC]=GAL4-Kr.C}DC1,P{w[+mC]=UAS-GFP.S65T}DC5, sn[+]	52331	116569	XM22A	XASY043	No	Yes	Category A Increase number
Coq8	Coenzyme Q8	FBgn0052649	Coq8[B]	p.R629C	y[1] w[*] Coq8[B] P{ry[+t7.2]=neoFRT}19A / FM7c, P{w[+mC]=GAL4-Kr.C}DC1,P{w[+mC]=UAS-GFP.S65T}DC5, sn[+]	52332	116572	XM22B	XBSY113	No	Yes	Category A Increase number
Cp7Fb	Chorion protein b at 7F	FBgn0014465	Cp7Fb[B]	p.P1372S	l(1)XM29[B], y[1] w[*] P{ry[+t7.2]=neoFRT}19A / FM7c, P{w[+mC]=GAL4-Kr.C}DC1,P{w[+mC]=UAS-GFP.S65T}DC5, sn[+]	N/A	116674	XM29B	XJSY048	No (Cell lethal)	Yes	Category A Increase number
Crag	Calmodulin-binding protein related to a Rab3 GDP/GTP exchange protein	FBgn0025864	Crag[C]	p.R798X	y[1] w[*] Crag[C] P{ry[+t7.2]=neoFRT}19A / FM7c, P{w[+mC]=GAL4-Kr.C}DC1,P{w[+mC]=UAS-GFP.S65T}DC5, sn[+]	N/A	116852	XE10C	XIYF011	Yes	Yes	No change
dlg	discs large 1	FBgn0001624	dlg[A]	p.Q551X	y[1] w[*] dlg1[A] P{ry[+t7.2]=neoFRT}19A / FM7c, P{w[+mC]=GAL4-Kr.C}DC1,P{w[+mC]=UAS-GFP.S65T}DC5, sn[+]	57086	116579	XM03A	XDSY001	No (Cell lethal)	Yes	No change
dlg	discs large 1	FBgn0001624	dlg[B]	splice donor site	y[1] w[*] dlg1[B] P{ry[+t7.2]=neoFRT}19A / FM7c, P{w[+mC]=GAL4-Kr.C}DC1,P{w[+mC]=UAS-GFP.S65T}DC5, sn[+]	57087	116646	XM03B	XIBX040	No (No eclosion)	Yes	No change
Dlic	Dynein light intermediate chain	FBgn0030276	Dlic[B]	p.R1021X	y[1] w[*] Dlic[B] P{ry[+t7.2]=neoFRT}19A / FM7c, P{w[+mC]=GAL4-Kr.C}DC1,P{w[+mC]=UAS-GFP.S65T}DC5, sn[+]	N/A	116672	XM04B	XJCB130	Yes	Yes	No change
Dlic	Dynein light intermediate chain	FBgn0030276	Dlic[C]	p.Q1090X	y[1] w[*] Dlic[C] P{ry[+t7.2]=neoFRT}19A / FM7c, P{w[+mC]=GAL4-Kr.C}DC1,P{w[+mC]=UAS-GFP.S65T}DC5, sn[+]	N/A	116714	XM04C	XLMJ132	No (Cell lethal)	Yes	No change
dor	deep orange	FBgn0000482	dor[A]	p.M216K	y[1] dor[A] w[*] P{ry[+t7.2]=neoFRT}19A / FM7c, P{w[+mC]=GAL4-Kr.C}DC1,P{w[+mC]=UAS-GFP.S65T}DC5, sn[+]	N/A	116766	XE05A	XASY040	Yes	Yes	No change
dor	deep orange	FBgn0000482	dor[C]	p.P208X	y[1] dor[C] w[*] P{ry[+t7.2]=neoFRT}19A / FM7c, P{w[+mC]=GAL4-Kr.C}DC1,P{w[+mC]=UAS-GFP.S65T}DC5, sn[+]	52350	116862	XE05C	XJCB028	Yes	Yes	No change
dsh	dishevelled	FBgn0000499	dsh[A]	unidentified (mapped by complementation)	y[1] w[*] dsh[A] P{ry[+t7.2]=neoFRT}19A / FM7c, P{w[+mC]=GAL4-Kr.C}DC1,P{w[+mC]=UAS-GFP.S65T}DC5, sn[+]	N/A	116574	XM01A	XCMJ103	No (No eclosion)	Yes	Inconsistent
dsh	dishevelled	FBgn0000499	dsh[B]	unidentified (mapped by complementation)	y[1] w[*] dsh[B] P{ry[+t7.2]=neoFRT}19A / FM7c, P{w[+mC]=GAL4-Kr.C}DC1,P{w[+mC]=UAS-GFP.S65T}DC5, sn[+]	54795	116589	XM01B	XEMJ136	No (No eclosion)	Yes	No change
Dsor1	Downstream of raf1	FBgn0010269	Dsor1[B]	p.N4D	y[1] w[*] Dsor1[B] P{ry[+t7.2]=neoFRT}19A / FM7c, P{w[+mC]=GAL4-Kr.C}DC1, P{w[+mC]=UAS-GFP.S65T}DC5, sn[+]	N/A	116916	XE03B	XLBX051	Yes	Yes	No change
Dsor1	Downstream of raf1	FBgn0010269	Dsor1[A]	p.G229D	y[1] w[*] Dsor1[A] P{ry[+t7.2]=neoFRT}19A / FM7c, P{w[+mC]=GAL4-Kr.C}DC1, P{w[+mC]=UAS-GFP.S65T}DC5, sn[+]	N/A (lost)	N/A (lost)	XE03A	XHSY006	Yes	Yes	No change
dwg	deformed wings	FBgn0000520	dwg[A]	p.C363S	y[1] dwg[A] w[*] P{ry[+t7.2]=neoFRT}19A / FM7c, P{w[+mC]=GAL4-Kr.C}DC1,P{w[+mC]=UAS-GFP.S65T}DC5, sn[+]	57088	116620	XM11A	XGSY203	No (Cell lethal)	Yes	No change
dwg	deformed wings	FBgn0000520	dwg[B]	p.H411L	y[1] dwg[B] w[*] P{ry[+t7.2]=neoFRT}19A / FM7c, P{w[+mC]=GAL4-Kr.C}DC1,P{w[+mC]=UAS-GFP.S65T}DC5, sn[+]	57089	116751	XM11B	XMMJ151	No (Cell lethal)	Yes	No change
elav	embryonic lethal abnormal vision	FBgn0260400	elav[A]	unidentified (mapped by complementation)	y[1] elav[A] w[*] P{ry[+t7.2]=neoFRT}19A / FM7c, P{w[+mC]=GAL4-Kr.C}DC1,P{w[+mC]=UAS-GFP.S65T}DC5, sn[+]	52355	117065	XE29A	XGSY028	Yes	No	No change
elav	embryonic lethal abnormal vision	FBgn0260400	elav[B]	p.Q122X	y[1] elav[B] w[*] P{ry[+t7.2]=neoFRT}19A / FM7c, P{w[+mC]=GAL4-Kr.C}DC1, P{w[+mC]=UAS-GFP.S65T}DC5, sn[+]	52356	117124	XE29B	XJVB037	Yes	No	No change
ewg	erect wing	FBgn0005427	ewg[A]	p.Q544K	ewg[A] y[1] w[*] P{ry[+t7.2]=neoFRT}19A / FM7c, P{w[+mC]=GAL4-Kr.C}DC1,P{w[+mC]=UAS-GFP.S65T}DC5, sn[+]	52357	116885	XE01A	XKHW134	Yes	No	No change
ewg	erect wing	FBgn0005427	ewg[B]	p.Q166X	ewg[B] y[1] w[*] P{ry[+t7.2]=neoFRT}19A / FM7c, P{w[+mC]=GAL4-Kr.C}DC1,P{w[+mC]=UAS-GFP.S65T}DC5, sn[+]	52358	116886	XE01B	XKHW186	Yes	No	No change
Flacc	Fl(2)d-associated complex component	FBgn0030974	Flacc[E]	unidentified (mapped by complementation)	y[1] w[*] Flacc[E] P{ry[+t7.2]=neoFRT}19A / FM7c, P{w[+mC]=GAL4-Kr.C}DC1,P{w[+mC]=UAS-GFP.S65T}DC5, sn[+]	N/A	116566	XM26A	XACT025	No	Yes	No change
Flacc	Fl(2)d-associated complex component	FBgn0030974	Flacc[C]	p.L730X	y[1] w[*] Flacc[C] P{ry[+t7.2]=neoFRT}19A / FM7c, P{w[+mC]=GAL4-Kr.C}DC1,P{w[+mC]=UAS-GFP.S65T}DC5, sn[+]	57082	116735	XM26C	XLYF057	No	Yes	No change
Flacc	Fl(2)d-associated complex component	FBgn0030974	Flacc[A]	p.N782S	y[1] w[*] Flacc[A] P{ry[+t7.2]=neoFRT}19A / FM7c, P{w[+mC]=GAL4-Kr.C}DC1,P{w[+mC]=UAS-GFP.S65T}DC5, sn[+]	57081	117212	XE33A	XMSY014	Yes	Yes	No change
Flacc	Fl(2)d-associated complex component	FBgn0030974	Flacc[B]	unidentified (mapped by complementation)	y[1] w[*] Flacc[B] P{ry[+t7.2]=neoFRT}19A / FM7c, P{w[+mC]=GAL4-Kr.C}DC1,P{w[+mC]=UAS-GFP.S65T}DC5, sn[+]	N/A	117216	XE33B	XMYF051	Yes	Yes	No change
fs[1]h	female sterile (1) homeotic	FBgn0004656	fs[1]h[C]	unidentified (mapped by complementation)	y[1] w[*] fs(1)h[C] P{ry[+t7.2]=neoFRT}19A / FM7c, P{w[+mC]=GAL4-Kr.C}DC1,P{w[+mC]=UAS-GFP.S65T}DC5, sn[+]	N/A	117025	XE59C	XAWL035	Yes	Yes	Category B Enlargement AND Category A
fs[1]h	female sterile (1) homeotic	FBgn0004656	fs[1]h[A]	p.K1115X	y[1] w[*] fs(1)h[A] P{ry[+t7.2]=neoFRT}19A / FM7c, P{w[+mC]=GAL4-Kr.C}DC1, P{w[+mC]=UAS-GFP.S65T}DC5, sn[+]	N/A	117141	XE59A	XKHW143	Yes	Yes	Category B Enlargement AND Category A
fs[1]h	female sterile (1) homeotic	FBgn0004656	fs[1]h[B]	p.W211X	y[1] w[*] fs(1)h[B] P{ry[+t7.2]=neoFRT}19A / FM7c, P{w[+mC]=GAL4-Kr.C}DC1,P{w[+mC]=UAS-GFP.S65T}DC5, sn[+]	N/A	117208	XE59B	XMHW171	No	Yes	Category B Enlargement AND Category A
Fum1	Fumarase 1	FBgn0286222	Fum1[B]	p.S172F	y[1] w[*] Fum1[B] P{ry[+t7.2]=neoFRT}19A / FM7c, P{w[+mC]=GAL4-Kr.C}DC1,P{w[+mC]=UAS-GFP.S65T}DC5, sn[+]	52369	117028	XE43B	XBSY308	Yes	No	No change
Fum1	Fumarase 1	FBgn0286222	Fum1[A]	p.V141M	y[1] w[*] Fum1[A] P{ry[+t7.2]=neoFRT}19A / FM7c, P{w[+mC]=GAL4-Kr.C}DC1,P{w[+mC]=UAS-GFP.S65T}DC5, sn[+]	52368	117076	XE43A	XGZK069	Yes	No	Category A Increase number
fzr	fizzy-related	FBgn0262699	fzr[A]	unidentified (mapped by complementation)	y[1] w[*] fzr[A] P{ry[+t7.2]=neoFRT}19A / FM7c, P{w[+mC]=GAL4-Kr.C}DC1, P{w[+mC]=UAS-GFP.S65T}DC5, sn[+]	52384	117026	XE49A	XAWL051	Yes	Yes	No change
fzr	fizzy-related	FBgn0262699	fzr[B]	unidentified (mapped by complementation)	y[1] w[*] fzr[B] P{ry[+t7.2]=neoFRT}19A / FM7c, P{w[+mC]=GAL4-Kr.C}DC1, P{w[+mC]=UAS-GFP.S65T}DC5, sn[+]	52385	117139	XE49B	XKHW071	Yes	Yes	No change
GCS1	Glucosidase 1	FBgn0030289	GCS1[A]	p.G836D	y[1] w[*] GCS1[A] P{ry[+t7.2]=neoFRT}19A / FM7c, P{w[+mC]=GAL4-Kr.C}DC1,P{w[+mC]=UAS-GFP.S65T}DC5, sn[+]	57073	116776	XG13A	XDSY113	No (No eclosion)	Yes	Inconsistent
GCS1	Glucosidase 1	FBgn0030289	GCS1[B]	p.S577Nfs	y[1] w[*] GCS1[B] P{ry[+t7.2]=neoFRT}19A / FM7c, P{w[+mC]=GAL4-Kr.C}DC1,P{w[+mC]=UAS-GFP.S65T}DC5, sn[+]	N/A	116895	XG13B	XKMJ231	No (No eclosion)	Yes	No change
Gtp-bp	GTP-binding protein	FBgn0010391	Gtp-bp[A]	splice acceptor site	y[1] w[*] Gtp-bp[A] P{ry[+t7.2]=neoFRT}19A / FM7c, P{w[+mC]=GAL4-Kr.C}DC1,P{w[+mC]=UAS-GFP.S65T}DC5, sn[+]	N/A	116678	XM36A	XJVB062	No	Yes	No change
Gtp-bp	GTP-binding protein	FBgn0010391	Gtp-bp[B]	p.V439D	y[1] w[*] Gtp-bp[B] P{ry[+t7.2]=neoFRT}19A / FM7c, P{w[+mC]=GAL4-Kr.C}DC1,P{w[+mC]=UAS-GFP.S65T}DC5, sn[+]	52359	116708	XM36B	XLHW037	No (Cell lethal)	Yes	No change
hop	hopscotch	FBgn0004864	hop[A]	p.D1076N	y[1] w[*] hop[A] P{ry[+t7.2]=neoFRT}19A / FM7c, P{w[+mC]=GAL4-Kr.C}DC1,P{w[+mC]=UAS-GFP.S65T}DC5, sn[+]	N/A	117023	XE35A	XAVB010	No	Yes	No change
hop	hopscotch	FBgn0004864	hop[C]	p.Q39X	y[1] w[*] hop[C] P{ry[+t7.2]=neoFRT}19A / FM7c, P{w[+mC]=GAL4-Kr.C}DC1,P{w[+mC]=UAS-GFP.S65T}DC5, sn[+]	52361	117169	XE35C	XLHW028	Yes	Yes	No change
Hr4	Hormone receptor 4	FBgn0264562	Hr4[B]	p.W885X	y[1] Hr4[B] w[*] P{ry[+t7.2]=neoFRT}19A / FM7c, P{w[+mC]=GAL4-Kr.C}DC1,P{w[+mC]=UAS-GFP.S65T}DC5, sn[+]	N/A	116848	XP01B	XISY094	No	Yes	No change
kdn	knockdown	FBgn0261955	kdn[A]	p.W370R	y[1] w[*] kdn[A] P{ry[+t7.2]=neoFRT}19A / FM7c, P{w[+mC]=GAL4-Kr.C}DC1,P{w[+mC]=UAS-GFP.S65T}DC5, sn[+]	52364	116801	XE16A	XFSY050	Yes	Yes	No change
kdn	knockdown	FBgn0261955	kdn[C]	unidentified (mapped by complementation)	y[1] w[*] kdn[C] P{ry[+t7.2]=neoFRT}19A / FM7c, P{w[+mC]=GAL4-Kr.C}DC1,P{w[+mC]=UAS-GFP.S65T}DC5, sn[+]	N/A	116949	XE16C	XMBX079	Yes	No	No change
Lrpprc2	Leucine-rich pentatricopeptide repeat containing 2	FBgn0027794	Lrpprc2[A]	p.W151X	y[1] Lrpprc2[A] w[*] P{ry[+t7.2]=neoFRT}19A / FM7c, P{w[+mC]=GAL4-Kr.C}DC1,P{w[+mC]=UAS-GFP.S65T}DC5, sn[+]	N/A	117056	XE26A	XFSY017	Yes	Yes	No change
Lrpprc2	Leucine-rich pentatricopeptide repeat containing 2	FBgn0027794	Lrpprc2[B]	p.Q731X	y[1] Lrpprc2[B] w[*] P{ry[+t7.2]=neoFRT}19A / FM7c, P{w[+mC]=GAL4-Kr.C}DC1,P{w[+mC]=UAS-GFP.S65T}DC5, sn[+]	N/A	117107	XE26B	XIYF062	Yes	Yes	No change
Marf	Mitochondrial assembly regulatory factor	FBgn0029870	Marf[A]	p.H494fsX93	y[1] w[*] Marf[A] P{ry[+t7.2]=neoFRT}19A / FM7c, P{w[+mC]=GAL4-Kr.C}DC1,P{w[+mC]=UAS-GFP.S65T}DC5, sn[+]	N/A	116785	XE15A	XESY056	Yes	Yes	No change
Marf	Mitochondrial assembly regulatory factor	FBgn0029870	Marf[B]	p.I222N	y[1] w[*] Marf[B] P{ry[+t7.2]=neoFRT}19A / FM7c, P{w[+mC]=GAL4-Kr.C}DC1,P{w[+mC]=UAS-GFP.S65T}DC5, sn[+]	N/A	116877	XE15B	XJZK076	Yes	Yes	Inconsistent
Marf	Mitochondrial assembly regulatory factor	FBgn0029870	Marf[H]	p.V693E	y[1] w[*] Marf[H] P{ry[+t7.2]=neoFRT}19A / FM7c, P{w[+mC]=GAL4-Kr.C}DC1,P{w[+mC]=UAS-GFP.S65T}DC5, sn[+]	N/A	116924	xe15h	XLMJ101	Yes	No	No change
Marf	Mitochondrial assembly regulatory factor	FBgn0029870	Marf[G]	p.Q65X	y[1] w[*] Marf[G] P{ry[+t7.2]=neoFRT}19A / FM7c, P{w[+mC]=GAL4-Kr.C}DC1,P{w[+mC]=UAS-GFP.S65T}DC5, sn[+]	N/A (lost)	N/A (lost)	XE15G	XLHW115	Yes	Yes	No change
Mcm6	Minichromosome maintenance 6	FBgn0025815	Mcm6[B]	p.L362P	y[1] w[*] Mcm6[B] P{ry[+t7.2]=neoFRT}19A / FM7c, P{w[+mC]=GAL4-Kr.C}DC1,P{w[+mC]=UAS-GFP.S65T}DC5, sn[+]	57099	116623	XM16B	XGZK054	No (Cell lethal)	Yes	No change
Mcm6	Minichromosome maintenance 6	FBgn0025815	Mcm6[D]	unidentified (mapped by complementation)	y[1] w[*] Mcm6[D] P{ry[+t7.2]=neoFRT}19A / FM7c, P{w[+mC]=GAL4-Kr.C}DC1,P{w[+mC]=UAS-GFP.S65T}DC5, sn[+]	N/A	116727	XM16D	XLSY117	No (Cell lethal)	Yes	No change
mldr	mulder	FBgn0029858	mldr[A]	unidentified (mapped by complementation)	y[1] w[*] mldr[A] P{ry[+t7.2]=neoFRT}19A / FM7c, P{w[+mC]=GAL4-Kr.C}DC1,P{w[+mC]=UAS-GFP.S65T}DC5, sn[+]	N/A	116816	XE20A	XGSY173	Yes	Yes	No change
mldr	mulder	FBgn0029858	mldr[B]	p.Y121D	y[1] w[*] mldr[B] P{ry[+t7.2]=neoFRT}19A / FM7c, P{w[+mC]=GAL4-Kr.C}DC1,P{w[+mC]=UAS-GFP.S65T}DC5, sn[+]	57070	116953	XE20B	XMHW146	Yes	Yes	No change
mldr	mulder	FBgn0029858	mldr[D]	unidentified (mapped by complementation)	y[1] w[*] mldr[D] P{ry[+t7.2]=neoFRT}19A / FM7c, P{w[+mC]=GAL4-Kr.C}DC1,P{w[+mC]=UAS-GFP.S65T}DC5, sn[+]	N/A	117129	XE64A	XJYF038	Yes	Yes	No change
mRNA-cap	mRNA-capping-enzyme	CG1810	mRNA-cap[A]	p.Y346X	y[1] w[*] mRNA-cap[A] P{ry[+t7.2]=neoFRT}19A / FM7c, P{w[+mC]=GAL4-Kr.C}DC1,P{w[+mC]=UAS-GFP.S65T}DC5, sn[+]	57100	116606	XM37A	XEZK082	No (Cell lethal)	Yes	No change
MTPAP	mitochondrial poly(A) polymerase	FBgn0024360	MTPAP[A]	unidentified (mapped by complementation)	y[1] MTPAP[A] w[*] P{ry[+t7.2]=neoFRT}19A / FM7c, P{w[+mC]=GAL4-Kr.C}DC1,P{w[+mC]=UAS-GFP.S65T}DC5, sn[+]	N/A	116793	XE24A	XEVB116	Yes	Yes	Category A Increase number
MTPAP	mitochondrial poly(A) polymerase	FBgn0024360	MTPAP[B]	unidentified (mapped by complementation)	y[1] MTPAP[B] w[*] P{ry[+t7.2]=neoFRT}19A / FM7c, P{w[+mC]=GAL4-Kr.C}DC1,P{w[+mC]=UAS-GFP.S65T}DC5, sn[+]	N/A	117087	XE24B	XHYF064	Yes	Yes	Category A Increase number
mxc	multi sex combs	FBgn0260789	mxc[F]	p.K615X	y[1] w[*] mxc[F] P{ry[+t7.2]=neoFRT}19A / FM7c, P{w[+mC]=GAL4-Kr.C}DC1,P{w[+mC]=UAS-GFP.S65T}DC5, sn[+]	57104	116647	XM20E	XIBX043	No (Cell lethal)	Yes	Category A Increase number
mxc	multi sex combs	FBgn0260789	mxc[C]	unidentified (mapped by complementation)	y[1] w[*] mxc[C] P{ry[+t7.2]=neoFRT}19A / FM7c, P{w[+mC]=GAL4-Kr.C}DC1,P{w[+mC]=UAS-GFP.S65T}DC5, sn[+]	N/A	116660	XM20C	XISY190	No (Cell lethal)	Yes	Category A Increase number
mxc	multi sex combs	FBgn0260789	mxc[D]	unidentified (mapped by complementation)	y[1] w[*] mxc[D] P{ry[+t7.2]=neoFRT}19A / FM7c, P{w[+mC]=GAL4-Kr.C}DC1,P{w[+mC]=UAS-GFP.S65T}DC5, sn[+]	N/A	116738	XM20D	XLZK012	No (Cell lethal)	Yes	Category A Increase number
mxc	multi sex combs	FBgn0260789	mxc[A]	p.Q520X	y[1] w[*] mxc[A] P{ry[+t7.2]=neoFRT}19A / FM7c, P{w[+mC]=GAL4-Kr.C}DC1,P{w[+mC]=UAS-GFP.S65T}DC5, sn[+]	N/A (lost)	N/A (lost)	XM20A	XESY143	No (Cell lethal)	Yes	Category A Increase number
mxc	multi sex combs	FBgn0260789	mxc[B]	unidentified (mapped by complementation)	y[1] w[*] mxc[B] P{ry[+t7.2]=neoFRT}19A / FM7c, P{w[+mC]=GAL4-Kr.C}DC1,P{w[+mC]=UAS-GFP.S65T}DC5, sn[+]	N/A (lost)	N/A (lost)	XM20B	XMYF026	No (Cell lethal)	Yes	Category A Increase number
mxc	multi sex combs	FBgn0260789	mxc[E]	p.S141X	y[1] w[*] mxc[E] P{ry[+t7.2]=neoFRT}19A / FM7c, P{w[+mC]=GAL4-Kr.C}DC1,P{w[+mC]=UAS-GFP.S65T}DC5, sn[+]	N/A (lost)	N/A (lost)	XM20F	XLHW040	No (Cell lethal)	Yes	Category A Increase number
mys	myospheroid	FBgn0004657	mys[J]	unidentified (mapped by complementation)	y[1] w[*] mys[J] P{ry[+t7.2]=neoFRT}19A / FM7c, P{w[+mC]=GAL4-Kr.C}DC1,P{w[+mC]=UAS-GFP.S65T}DC5, sn[+]	N/A	117038	XE57J	XDZK015	Yes	Yes	No change
N	Notch	FBgn0004647	N[XB]	unidentified (mapped by complementation)	y[1] w[*] N[XB] P{ry[+t7.2]=neoFRT}19A / FM7c, P{w[+mC]=GAL4-Kr.C}DC1,P{w[+mC]=UAS-GFP.S65T}DC5, sn[+]	N/A	116625	XM13B	XGZK071	No	Yes	No change
N	Notch	FBgn0004647	N[XE]	unidentified (mapped by complementation)	y[1] w[*] N[XE] P{ry[+t7.2]=neoFRT}19A / FM7c, P{w[+mC]=GAL4-Kr.C}DC1,P{w[+mC]=UAS-GFP.S65T}DC5, sn[+]	N/A	116653	XM13E	XISY024	No	Yes	No change
nej	nejire	FBgn0261617	nej[B]	p.Y1001N	y[1] w[*] nej[B] P{ry[+t7.2]=neoFRT}19A / FM7c, P{w[+mC]=GAL4-Kr.C}DC1,P{w[+mC]=UAS-GFP.S65T}DC5, sn[+]	57105	116915	XE04B	XLBX035	Yes	Yes	No change
nej	nejire	FBgn0261617	nej[A]	p.G229D	y[1] w[*] nej[A] P{ry[+t7.2]=neoFRT}19A / FM7c, P{w[+mC]=GAL4-Kr.C}DC1,P{w[+mC]=UAS-GFP.S65T}DC5, sn[+]	N/A (lost)	N/A (lost)	XE04A	XESY015	Yes	No	No change
Nrd1	Nardilysin	FBgn0030344	Nrd1[D]	p.K134X	y[1] w[*] Nrd1[D] P{ry[+t7.2]=neoFRT}19A / FM7c, P{w[+mC]=GAL4-Kr.C}DC1,P{w[+mC]=UAS-GFP.S65T}DC5, sn[+]	N/A	116723	XM23A	XLSY019	No	Yes	Inconsistent
Nrd1	Nardilysin	FBgn0030344	Nrd1[E]	p.W369X	y[1] w[*] Nrd1[E] P{ry[+t7.2]=neoFRT}19A / FM7c, P{w[+mC]=GAL4-Kr.C}DC1,P{w[+mC]=UAS-GFP.S65T}DC5, sn[+]	N/A	116741	XM23B	XMAJ136	No	Yes	No change
Nrd1	Nardilysin	FBgn0030344	Nrd1[W369X]	p.W369X	y[1] w[*] Nrd1[W369X] P{ry[+t7.2]=neoFRT}19A / FM7c, P{w[+mC]=GAL4-Kr.C}DC1,P{w[+mC]=UAS-GFP.S65T}DC5, sn[+]	57076	117177	XE54A	XLSY020	Yes	Yes	No change
Nrd1	Nardilysin	FBgn0030344	Nrd1[Q376X]	p.Q376X	y[1] w[*] Nrd1[Q376X] P{ry[+t7.2]=neoFRT}19A / FM7c, P{w[+mC]=GAL4-Kr.C}DC1,P{w[+mC]=UAS-GFP.S65T}DC5, sn[+]	57077	117183	XE54B	XLWL116	Yes	Yes	No change
Nrg	Neuroglian	FBgn0264975	Nrg[XA]	unidentified (mapped by complementation)	y[1] w[*] Nrg[XA] P{ry[+t7.2]=neoFRT}19A / FM7c, P{w[+mC]=GAL4-Kr.C}DC1,P{w[+mC]=UAS-GFP.S65T}DC5, sn[+]		117042	XE36A	XEMJ148	Yes	Yes	Inconsistent
Nrg	Neuroglian	FBgn0264975	Nrg[XB]	unidentified (mapped by complementation)	y[1] w[*] Nrg[XB] P{ry[+t7.2]=neoFRT}19A / FM7c, P{w[+mC]=GAL4-Kr.C}DC1,P{w[+mC]=UAS-GFP.S65T}DC5, sn[+]	N/A (lost)	N/A (lost)	XE36B	XISY204	Yes	Yes	Category A Increase number
oc	ocelliless	FBgn0004102	oc[D]	unidentified (mapped by complementation)	y[1] w[*] oc[D] P{ry[+t7.2]=neoFRT}19A / FM7c, P{w[+mC]=GAL4-Kr.C}DC1, P{w[+mC]=UAS-GFP.S65T}DC5, sn[+]	N/A	116683	XG02A	XJYF061	No (Cell lethal)	Yes	No change
oc	ocelliless	FBgn0004102	oc[B]	splice acceptor site	y[1] w[*] oc[B] P{ry[+t7.2]=neoFRT}19A / FM7c, P{w[+mC]=GAL4-Kr.C}DC1, P{w[+mC]=UAS-GFP.S65T}DC5, sn[+]	57107	116691	XG02B	XKMJ234	No	Yes	No change
oc	ocelliless	FBgn0004102	oc[A]	p.Q469X	y[1] w[*] oc[A] P{ry[+t7.2]=neoFRT}19A / FM7c, P{w[+mC]=GAL4-Kr.C}DC1, P{w[+mC]=UAS-GFP.S65T}DC5, sn[+]	57106	117215	XE41A	XMWL160	Yes	No	No change
pck	pickel	FBgn0013720	pck[A]	p.P50L	y[1] pck[A] w[*] P{ry[+t7.2]=neoFRT}19A / FM7c, P{w[+mC]=GAL4-Kr.C}DC1,P{w[+mC]=UAS-GFP.S65T}DC5, sn[+]	57110	117106	XE62A	XIYF045	Yes	No	No change
Pdha	Pyruvate dehydrogenase E1 alpha subunit	FBgn0028325	Pdha[A]	p.G126E	y[1] w[*] Pdha[A] P{ry[+t7.2]=neoFRT}19A / FM7c, P{w[+mC]=GAL4-Kr.C}DC1,P{w[+mC]=UAS-GFP.S65T}DC5, sn[+]	52370	116774	XE21A	XDSY004	Yes	No	No change
Pdha	Pyruvate dehydrogenase E1 alpha subunit	FBgn0028325	Pdha[B]	p.S296F	y[1] w[*] Pdha[B] P{ry[+t7.2]=neoFRT}19A / FM7c, P{w[+mC]=GAL4-Kr.C}DC1,P{w[+mC]=UAS-GFP.S65T}DC5, sn[+]	52371	116819	XE21B	XGZK063	Yes	No	No change
PI4KIIIα	Phosphatidylinositol 4-kinase III α	FBgn0267350	PI4KIIIα[S]	unidentified (mapped by complementation)	y[1] PI4KIIIα[S] w[*] P{ry[+t7.2]=neoFRT}19A / FM7c, P{w[+mC]=GAL4-Kr.C}DC1,P{w[+mC]=UAS-GFP.S65T}DC5, sn[+]	N/A	116634	XM32A	XHSY064	No	Yes	No change
PI4KIIIα	Phosphatidylinositol 4-kinase III α	FBgn0267350	PI4KIIIα[T]	unidentified (mapped by complementation)	y[1] PI4KIIIα[T] w[*] P{ry[+t7.2]=neoFRT}19A / FM7c, P{w[+mC]=GAL4-Kr.C}DC1,P{w[+mC]=UAS-GFP.S65T}DC5, sn[+]	N/A	116724	XM32B	XLSY048	No (Cell lethal)	Yes	No change
PI4KIIIα	Phosphatidylinositol 4-kinase III α	FBgn0267350	PI4KIIIα[V]	p.Q139X	y[1] PI4KIIIα[V] w[*] P{ry[+t7.2]=neoFRT}19A / FM7c, P{w[+mC]=GAL4-Kr.C}DC1,P{w[+mC]=UAS-GFP.S65T}DC5, sn[+]	N/A	116783	XG04B	XESY009	No (No eclosion)	Yes	No change
PI4KIIIα	Phosphatidylinositol 4-kinase III α	FBgn0267350	PI4KIIIα[W]	p.Q811X	y[1] PI4KIIIα[W] w[*] P{ry[+t7.2]=neoFRT}19A / FM7c, P{w[+mC]=GAL4-Kr.C}DC1,P{w[+mC]=UAS-GFP.S65T}DC5, sn[+]	N/A	116822	XG04C	XGZK133	No (Cell lethal)	Yes	Category A Increase number
PI4KIIIα	Phosphatidylinositol 4-kinase III α	FBgn0267350	PI4KIIIα[D]	p.Q997X	y[1] PI4KIIIα[D] w[*] P{ry[+t7.2]=neoFRT}19A / FM7c, P{w[+mC]=GAL4-Kr.C}DC1,P{w[+mC]=UAS-GFP.S65T}DC5, sn[+]	N/A	116861	XG04D	XJCB014	No (No eclosion)	Yes	No change
PI4KIIIα	Phosphatidylinositol 4-kinase III α	FBgn0267350	PI4KIIIα[E]	p.W1016X	y[1] PI4KIIIα[E] w[*] P{ry[+t7.2]=neoFRT}19A / FM7c, P{w[+mC]=GAL4-Kr.C}DC1,P{w[+mC]=UAS-GFP.S65T}DC5, sn[+]	N/A	116864	XG04E	XJCB133	No (No eclosion)	Yes	Category A Increase number
PI4KIIIα	Phosphatidylinositol 4-kinase III α	FBgn0267350	PI4KIIIalpha[B]	p.Q2126L	y[1] PI4KIIIalpha[B] w[*] P{ry[+t7.2]=neoFRT}19A / FM7c, P{w[+mC]=GAL4-Kr.C}DC1,P{w[+mC]=UAS-GFP.S65T}DC5, sn[+]	N/A	117105	XE45B	XIYF034	Yes	No	No change
por	porcupine	FBgn0004957	por[E]	unidentified (mapped by complementation)	y[1] w[*] por[E] P{ry[+t7.2]=neoFRT}19A / FM7c, P{w[+mC]=GAL4-Kr.C}DC1, P{w[+mC]=UAS-GFP.S65T}DC5, sn[+]	N/A	116570	XM15E	XBSY028	Yes	Yes	No change
por	porcupine	FBgn0004957	por[A]	unidentified (mapped by complementation)	y[1] w[*] por[A] P{ry[+t7.2]=neoFRT}19A / FM7c, P{w[+mC]=GAL4-Kr.C}DC1,P{w[+mC]=UAS-GFP.S65T}DC5, sn[+]	N/A	116690	XM15A	XKMJ194	No	Yes	No change
PpV	Protein phosphatase V	FBgn0003139	PpV[H]	p.H112L	y[1] w[*] PpV[H] P{ry[+t7.2]=neoFRT}19A / FM7c, P{w[+mC]=GAL4-Kr.C}DC1,P{w[+mC]=UAS-GFP.S65T}DC5, sn[+]	N/A	116703	XM17C	XLBX001	No	Yes	No change
PpV	Protein phosphatase V	FBgn0003139	PpV[D]	unidentified (mapped by complementation)	y[1] w[*] PpV[D] P{ry[+t7.2]=neoFRT}19A / FM7c, P{w[+mC]=GAL4-Kr.C}DC1,P{w[+mC]=UAS-GFP.S65T}DC5, sn[+]	N/A	116712	XM17D	XLHW116	No	Yes	No change
Ppv	Protein phosphatase V	FBgn0003139	PpV[E]	p.S195P	y[1] w[*] PpV[E] P{ry[+t7.2]=neoFRT}19A / FM7c, P{w[+mC]=GAL4-Kr.C}DC1,P{w[+mC]=UAS-GFP.S65T}DC5, sn[+]	N/A	116821	XE17A	XGZK087	Yes	Yes	No change
Ppv	Protein phosphatase V	FBgn0003139	PpV[B]	p.Q55L	y[1] w[*] PpV[B] P{ry[+t7.2]=neoFRT}19A / FM7c, P{w[+mC]=GAL4-Kr.C}DC1,P{w[+mC]=UAS-GFP.S65T}DC5, sn[+]	N/A	116826	XE17B	XHCB017	Yes	Yes	No change
Ppv	Protein phosphatase V	FBgn0003139	Ppv[A]	p.W203R	y[1] w[*] PpV[A] P{ry[+t7.2]=neoFRT}19A / FM7c, P{w[+mC]=GAL4-Kr.C}DC1,P{w[+mC]=UAS-GFP.S65T}DC5, sn[+]	57116	117035	XE51A	XDVB116	Yes	Yes	No change
Ppv	Protein phosphatase V	FBgn0003139	Ppv[C]	p.I117F	y[1] w[*] PpV[C] P{ry[+t7.2]=neoFRT}19A / FM7c, P{w[+mC]=GAL4-Kr.C}DC1,P{w[+mC]=UAS-GFP.S65T}DC5, sn[+]	57117	117192	XE51B	XLYF079	Yes	Yes	No change
Ppv	Protein phosphatase V	FBgn0003139	PpV[J]	p.H235L	y[1] w[*] PpV[J] P{ry[+t7.2]=neoFRT}19A / FM7c, P{w[+mC]=GAL4-Kr.C}DC1,P{w[+mC]=UAS-GFP.S65T}DC5, sn[+]	N/A (lost)	N/A (lost)	XP04B	XKHW007	No (Cell lethal)	Yes	No change
Raf	Raf oncogene	FBgn0003079	Raf[E]	unidentified (mapped by complementation)	y[1] Raf[E] w[*] P{ry[+t7.2]=neoFRT}19A / FM7c, P{w[+mC]=GAL4-Kr.C}DC1,P{w[+mC]=UAS-GFP.S65T}DC5, sn[+]	N/A	116725	XM10.1C	XLSY054	No (Cell lethal)	Yes	No change
Raf	Raf oncogene	FBgn0003079	Raf[A]	p.H546Y	y[1] Raf[A] w[*] P{ry[+t7.2]=neoFRT}19A / FM7c, P{w[+mC]=GAL4-Kr.C}DC1,P{w[+mC]=UAS-GFP.S65T}DC5, sn[+]	52381	117136	XE34A	XKCB031	Yes	Yes	No change
Raf	Raf oncogene	FBgn0003079	Raf[B]	p.L163R	y[1] Raf[B] w[*] P{ry[+t7.2]=neoFRT}19A / FM7c, P{w[+mC]=GAL4-Kr.C}DC1,P{w[+mC]=UAS-GFP.S65T}DC5, sn[+]	52382	117174	XE34B	XLMJ246	Yes	Yes	No change
Rbcn-3A	Rabconnectin-3A	FBgn0023458	Rbcn-3A[A]	p.Q41X	y[1] w[*] Rbcn-3A[A] P{ry[+t7.2]=neoFRT}19A / FM7c, P{w[+mC]=GAL4-Kr.C}DC1,P{w[+mC]=UAS-GFP.S65T}DC5, sn[+]	57120	116648	XM27A	XIBX063	No (Cell lethal)	Yes	No change
Rbcn-3A	Rabconnectin-3A	FBgn0023458	Rbcn-3A[B]	p.W291X	y[1] w[*] Rbcn-3A[B] P{ry[+t7.2]=neoFRT}19A / FM7c, P{w[+mC]=GAL4-Kr.C}DC1,P{w[+mC]=UAS-GFP.S65T}DC5, sn[+]	57121	116756	XM27B	XMWL177	Yes	Yes	No change
Rbcn-3A	Rabconnectin-3A	FBgn0023458	Rbcn-3A[G]	unidentified (mapped by complementation)	y[1] w[*] Rbcn-3A[G] P{ry[+t7.2]=neoFRT}19A / FM7c, P{w[+mC]=GAL4-Kr.C}DC1,P{w[+mC]=UAS-GFP.S65T}DC5, sn[+]	N/A	116841	XG14B	XHZK121	No (Cell lethal)	Yes	No change
Rbcn-3A	Rabconnectin-3A	FBgn0023458	Rbcn-3A[H]	unidentified (mapped by complementation)	y[1] w[*] Rbcn-3A[H] P{ry[+t7.2]=neoFRT}19A / FM7c, P{w[+mC]=GAL4-Kr.C}DC1,P{w[+mC]=UAS-GFP.S65T}DC5, sn[+]	N/A	116859	XG14C	XIZK099	No (Cell lethal)	Yes	No change
Rbcn-3B	Rabconnectin-3B	FBgn0023510	Rbcn-3B[A]	p.K895X	y[1] Rbcn-3B[A] w[*] P{ry[+t7.2]=neoFRT}19A / FM7c, P{w[+mC]=GAL4-Kr.C}DC1,P{w[+mC]=UAS-GFP.S65T}DC5, sn[+]	N/A	117049	XE56A	XESY177	No (Cell lethal)	Yes	Category A Increase number
Rbcn-3B	Rabconnectin-3B	FBgn0023510	Rbcn-3B[B]	p.R1294X	y[1] Rbcn-3B[B] w[*] P{ry[+t7.2]=neoFRT}19A / FM7c, P{w[+mC]=GAL4-Kr.C}DC1,P{w[+mC]=UAS-GFP.S65T}DC5, sn[+]	57122	117195	XE56B	XMAJ125	Yes	Yes	Category A Increase number
Rbf	Retinoblastoma-family protein	FBgn0015799	Rbf[B]	p.K118L	y[1] Rbf[B] w[*] P{ry[+t7.2]=neoFRT}19A / FM7c, P{w[+mC]=GAL4-Kr.C}DC1,P{w[+mC]=UAS-GFP.S65T}DC5, sn[+]	N/A	117119	XE28B	XJSY045	Yes	Yes	No change
RpII215	RNA polymerase II 215kD subunit	FBgn0003277	RpII215[A]	unidentified (mapped by complementation)	y[1] w[*] RpII215[A] P{ry[+t7.2]=neoFRT}19A / FM7c, P{w[+mC]=GAL4-Kr.C}DC1,P{w[+mC]=UAS-GFP.S65T}DC5, sn[+]	57126	116594	XM24A	XEMJ229	No (No eclosion)	Yes	No change
RpII215	RNA polymerase II 215kD subunit	FBgn0003277	RpII215[E]	unidentified (mapped by complementation)	y[1] w[*] RpII215[E] P{ry[+t7.2]=neoFRT}19A / FM7c, P{w[+mC]=GAL4-Kr.C}DC1,P{w[+mC]=UAS-GFP.S65T}DC5, sn[+]	N/A (lost)	N/A (lost)	XM24E	XKSY036	No (No eclosion)	Yes	No change
schlank	schlank	FBgn0040918	schlank[A]	p.S344P	y[1] w[*] schlank[A] P{ry[+t7.2]=neoFRT}19A / FM7c, P{w[+mC]=GAL4-Kr.C}DC1,P{w[+mC]=UAS-GFP.S65T}DC5, sn[+]	57128	116630	XM31	XHCB025	No	Yes	No change
schlank	schlank	FBgn0040918	schlank[B]	p.M1I (no start codon)	y[1] w[*] schlank[B] P{ry[+t7.2]=neoFRT}19A / FM7c, P{w[+mC]=GAL4-Kr.C}DC1,P{w[+mC]=UAS-GFP.S65T}DC5, sn[+]	N/A	116853	XP03A	XIYF043	No	Yes	No change
schlank	schlank	FBgn0040918	schlank[C]	unidentified (mapped by complementation)	y[1] w[*] schlank[C] P{ry[+t7.2]=neoFRT}19A / FM7c, P{w[+mC]=GAL4-Kr.C}DC1,P{w[+mC]=UAS-GFP.S65T}DC5, sn[+]	N/A	116934	XP03B	XLSY137	No	Yes	No change
scu	scully	FBgn0021765	scu[A]	p.Q159X	y[1] w[*] scu[A] P{ry[+t7.2]=neoFRT}19A / FM7c, P{w[+mC]=GAL4-Kr.C}DC1,P{w[+mC]=UAS-GFP.S65T}DC5, sn[+]	52388	117134	XE32A	XJZK056	Yes	Yes	No change
scu	scully	FBgn0021765	scu[B]	p.S163F	y[1] w[*] scu[B] P{ry[+t7.2]=neoFRT}19A / FM7c, P{w[+mC]=GAL4-Kr.C}DC1,P{w[+mC]=UAS-GFP.S65T}DC5, sn[+]	N/A	117187	XE32B	XLWL149	Yes	Yes	No change
sgg	shaggy	FBgn0003371	sgg[C]	unidentified (mapped by complementation)	y[1] sgg[C] w[*] P{ry[+t7.2]=neoFRT}19A / FM7c, P{w[+mC]=GAL4-Kr.C}DC1,P{w[+mC]=UAS-GFP.S65T}DC5, sn[+]	N/A	116898	XG05A	XKSY030	No (No eclosion)	Yes	Inconsistent
sgg	shaggy	FBgn0003371	sgg[E]	unidentified (mapped by complementation)	y[1] sgg[E] w[*] P{ry[+t7.2]=neoFRT}19A / FM7c, P{w[+mC]=GAL4-Kr.C}DC1,P{w[+mC]=UAS-GFP.S65T}DC5, sn[+]	N/A	116955	XG05C	XMHW174	No (No eclosion)	Yes	Category A Increase number
sgg	shaggy	FBgn0003371	sgg[A]	p.P223L	y[1] sgg[A] w[*] P{ry[+t7.2]=neoFRT}19A / FM7c, P{w[+mC]=GAL4-Kr.C}DC1,P{w[+mC]=UAS-GFP.S65T}DC5, sn[+]	57129	117027	XE37A	XBSY152	Yes	No	Category A Increase number
sgg	shaggy	FBgn0003371	sgg[B]	p.V68E	y[1] sgg[B] w[*] P{ry[+t7.2]=neoFRT}19A / FM7c, P{w[+mC]=GAL4-Kr.C}DC1,P{w[+mC]=UAS-GFP.S65T}DC5, sn[+]	64461	117117	XE37B	XJSY012	No (No eclosion)	Yes	Category A Increase number
shi	shibire	FBgn0003392	shi[C]	unidentified (mapped by complementation)	y[1] w[*] shi[C] P{ry[+t7.2]=neoFRT}19A / FM7c, P{w[+mC]=GAL4-Kr.C}DC1,P{w[+mC]=UAS-GFP.S65T}DC5, sn[+]	N/A	116883	XG12C	XKHW122	No (No eclosion)	Yes	Inconsistent
shi	shibire	FBgn0003392	shi[E]	unidentified (mapped by complementation)	y[1] w[*] shi[E] P{ry[+t7.2]=neoFRT}19A / FM7c, P{w[+mC]=GAL4-Kr.C}DC1,P{w[+mC]=UAS-GFP.S65T}DC5, sn[+]	N/A	116957	XG12E	XMSY016	No (Cell lethal)	Yes	No change
sicily	severe impairment of CI with lengthened youth	FBgn0030352	sicily[A]	p.Q211X	y[1] w[*] sicily[A] P{ry[+t7.2]=neoFRT}19A / FM7c, P{w[+mC]=GAL4-Kr.C}DC1,P{w[+mC]=UAS-GFP.S65T}DC5, sn[+]	N/A	116815	XE07A	XGSY167	Yes	Yes	No change
sicily	severe impairment of CI with lengthened youth	FBgn0030352	sicily[B]	potential splicing mutation	y[1] w[*] sicily[B] P{ry[+t7.2]=neoFRT}19A / FM7c, P{w[+mC]=GAL4-Kr.C}DC1,P{w[+mC]=UAS-GFP.S65T}DC5, sn[+]	N/A	116842	XE07B	XIBX062	Yes	No	No change
SMC3	Structural maintenance of chromosomes 3	FBgn0015615	SMC3[A]	p.K575X	y[1] w[*] SMC3[A] P{ry[+t7.2]=neoFRT}19A / FM7c, P{w[+mC]=GAL4-Kr.C}DC1,P{w[+mC]=UAS-GFP.S65T}DC5, sn[+]	57065	116791	XG15A	XESY151	No (Cell lethal)	Yes	No change
Smox	Smad on X	FBgn0025800	Smox[A]	p.Q313X	y[1] w[*] Smox[A] P{ry[+t7.2]=neoFRT}19A / FM7c, P{w[+mC]=GAL4-Kr.C}DC1,P{w[+mC]=UAS-GFP.S65T}DC5, sn[+]	57131	116629	XM38A	XGZK164	No	Yes	No change
Smox	Smad on X	FBgn0025800	Smox[B]	p.K394X	y[1] w[*] Smox[B] P{ry[+t7.2]=neoFRT}19A / FM7c, P{w[+mC]=GAL4-Kr.C}DC1,P{w[+mC]=UAS-GFP.S65T}DC5, sn[+]	N/A	116668	XM38B	XJCB013	No	Yes	Category A Increase number
Smr	Smrter	FBgn0265523	Smr[A]	unidentified (mapped by complementation)	y[1] w[*] Smr[A] P{ry[+t7.2]=neoFRT}19A / FM7c, P{w[+mC]=GAL4-Kr.C}DC1,P{w[+mC]=UAS-GFP.S65T}DC5, sn[+]	N/A	116679	XG03A	XJWL106	No (No eclosion)	Yes	No change
Smr	Smrter	FBgn0265523	Smr[M]	p.R2567X	y[1] w[*] Smr[M] P{ry[+t7.2]=neoFRT}19A / FM7c, P{w[+mC]=GAL4-Kr.C}DC1,P{w[+mC]=UAS-GFP.S65T}DC5, sn[+]	N/A	116687	XM39A	XKHW130	Yes	Yes	No change
Smr	Smrter	FBgn0265523	Smr[F]	unidentified (mapped by complementation)	y[1] w[*] Smr[F] P{ry[+t7.2]=neoFRT}19A / FM7c, P{w[+mC]=GAL4-Kr.C}DC1,P{w[+mC]=UAS-GFP.S65T}DC5, sn[+]	N/A	116698	XG03F	XKZK003	No (Cell lethal)	Yes	No change
Sp1	Sp1	FBgn0020378	Sp1[A]	p.C197S	y[1] w[*] Sp1[A] P{ry[+t7.2]=neoFRT}19A / FM7c, P{w[+mC]=GAL4-Kr.C}DC1,P{w[+mC]=UAS-GFP.S65T}DC5, sn[+]	57134	116828	XG09A	XHCB031	No	Yes	No change
Sp1	Sp1	FBgn0020378	Sp1[B]	p.Q8X	y[1] w[*] Sp1[B] P{ry[+t7.2]=neoFRT}19A / FM7c, P{w[+mC]=GAL4-Kr.C}DC1,P{w[+mC]=UAS-GFP.S65T}DC5, sn[+]	57135	116865	XG09B	XJSY021	No	Yes	No change
temp	tempura	FBgn0027296	temp[D]	p.Q27X	y[1] temp[D] w[*] P{ry[+t7.2]=neoFRT}19A / FM7c, P{w[+mC]=GAL4-Kr.C}DC1, P{w[+mC]=UAS-GFP.S65T}DC5, sn[+]	N/A	116598	XM12D	XESY204	No (Cell lethal)	Yes	Category A Increase number
temp	tempura	FBgn0027296	temp[A]	p.K14X	y[1] temp[A] w[*] P{ry[+t7.2]=neoFRT}19A / FM7c, P{w[+mC]=GAL4-Kr.C}DC1,P{w[+mC]=UAS-GFP.S65T}DC5, sn[+]	N/A	116627	XM12A	XGZK109	No (Cell lethal)	Yes	Category A Increase number
temp	tempura	FBgn0027296	temp[B]	p.Q309X	y[1] temp[B] w[*] P{ry[+t7.2]=neoFRT}19A / FM7c, P{w[+mC]=GAL4-Kr.C}DC1, P{w[+mC]=UAS-GFP.S65T}DC5, sn[+]	N/A	116628	XM12B	XGZK144	No (Cell lethal)	Yes	Category A Increase number
temp	tempura	FBgn0027296	temp[C]	p.L341X	y[1] temp[C] w[*] P{ry[+t7.2]=neoFRT}19A / FM7c, P{w[+mC]=GAL4-Kr.C}DC1,P{w[+mC]=UAS-GFP.S65T}DC5, sn[+]	N/A	116663	XM12C	XIYF046	No (Cell lethal)	Yes	No change
tko	technical knockout	FBgn0003714	tko[A]	p.L85H	y[1] tko[A] w[*] P{ry[+t7.2]=neoFRT}19A / FM7c, P{w[+mC]=GAL4-Kr.C}DC1,P{w[+mC]=UAS-GFP.S65T}DC5, sn[+]	52400	117031	XE30A	XDSY008	Yes	No	No change
tko	technical knockout	FBgn0003714	tko[B]	p.Q6X	y[1] tko[B] w[*] P{ry[+t7.2]=neoFRT}19A / FM7c, P{w[+mC]=GAL4-Kr.C}DC1,P{w[+mC]=UAS-GFP.S65T}DC5, sn[+]	52401	117063	XE30B	XGCB043	Yes	Yes	No change
trr	trithorax-related	FBgn0023518	trr[A]	p.R1477X	y[1] trr[A] w[*] P{ry[+t7.2]=neoFRT}19A / FM7c, P{w[+mC]=GAL4-Kr.C}DC1, P{w[+mC]=UAS-GFP.S65T}DC5, sn[+]	57137	117083	XE50A	XHSY013	Yes	Yes	No change
trr	trithorax-related	FBgn0023518	trr[B]	p.K512X	y[1] trr[B] w[*] P{ry[+t7.2]=neoFRT}19A / FM7c, P{w[+mC]=GAL4-Kr.C}DC1, P{w[+mC]=UAS-GFP.S65T}DC5, sn[+]	57138	117202	XE50B	XMBX064	Yes	Yes	No change
Uba5	Ubiquitin activating enzyme 5	FBgn0030305	Uba5[B]	p.K298X	y[1] w[*] Uba5[B] P{ry[+t7.2]=neoFRT}19A / FM7c, P{w[+mC]=GAL4-Kr.C}DC1,P{w[+mC]=UAS-GFP.S65T}DC5, sn[+]	N/A	116661	XM05B	XISY211	No (Cell lethal)	Yes	No change
Uba5	Ubiquitin activating enzyme 5	FBgn0030305	Uba5[A]	p.V178E	y[1] w[*] Uba5[A] P{ry[+t7.2]=neoFRT}19A / FM7c, P{w[+mC]=GAL4-Kr.C}DC1,P{w[+mC]=UAS-GFP.S65T}DC5, sn[+]	N/A (lost)	N/A (lost)	XM05A	XISY008	No	Yes	No change
Ubr3	Ubr3 ubiquitin ligase	FBgn0260970	Ubr3[A]	p.F949L	y[1] w[*] Ubr3[A] P{ry[+t7.2]=neoFRT}19A / FM7c, P{w[+mC]=GAL4-Kr.C}DC1,P{w[+mC]=UAS-GFP.S65T}DC5, sn[+]	N/A	116602	XM35A	XEVB155	No (Cell lethal)	Yes	No change
Ubr3	Ubr3 ubiquitin ligase	FBgn0260970	Ubr3[B]	p.L788X	y[1] w[*] Ubr3[B] P{ry[+t7.2]=neoFRT}19A / FM7c, P{w[+mC]=GAL4-Kr.C}DC1,P{w[+mC]=UAS-GFP.S65T}DC5, sn[+]	N/A	116636	XM35B	XHSY186	No (Cell lethal)	Yes	No change
Upf1	Upf1	FBgn0030354	Upf1[A]	p.I486N, p.H1002P, p.V1051G & p.A1106G	y[1] w[*] Upf1[A] P{ry[+t7.2]=neoFRT}19A / FM7c, P{w[+mC]=GAL4-Kr.C}DC1,P{w[+mC]=UAS-GFP.S65T}DC5, sn[+]	52402	117101	XE53A	XISY191	Yes	Yes	Category A Increase number
Upf1	Upf1	FBgn0030354	Upf1[B]	p.W120X	y[1] w[*] Upf1[B] P{ry[+t7.2]=neoFRT}19A / FM7c, P{w[+mC]=GAL4-Kr.C}DC1,P{w[+mC]=UAS-GFP.S65T}DC5, sn[+]	52403	117200	XE53B	XMBX040	Yes	No	Category A Increase number
Upf2	Upf2	FBgn0029992	Upf2[A]	unidentified (mapped by complementation)	y[1] w[*] Upf2[A] P{ry[+t7.2]=neoFRT}19A / FM7c, P{w[+mC]=GAL4-Kr.C}DC1,P{w[+mC]=UAS-GFP.S65T}DC5, sn[+]	N/A	117190	XE60A	XLYF039	Yes	Yes	Category A Increase number
Upf2	Upf2	FBgn0029992	Upf2[B]	unidentified (mapped by complementation)	y[1] w[*] Upf2[B] P{ry[+t7.2]=neoFRT}19A / FM7c, P{w[+mC]=GAL4-Kr.C}DC1,P{w[+mC]=UAS-GFP.S65T}DC5, sn[+]	N/A (lost)	N/A (lost)	XE60B	XGCB046	Yes	Yes	Category A Increase number
Usp16-45	Ubiquitin specific protease 16/45	FBgn0029763	Usp16-45[A]	unidentified (mapped by complementation)	y[1] w[*] Usp16-45[A] P{ry[+t7.2]=neoFRT}19A / FM7c, P{w[+mC]=GAL4-Kr.C}DC1,P{w[+mC]=UAS-GFP.S65T}DC5, sn[+]	N/A	116567	XM33A	XAKS009	No	Yes	Category A Increase number
Usp16-45	Ubiquitin specific protease 16/45	FBgn0029763	Usp16-45[B]	splice donor site	y[1] w[*] Usp16-45[B] P{ry[+t7.2]=neoFRT}19A / FM7c, P{w[+mC]=GAL4-Kr.C}DC1,P{w[+mC]=UAS-GFP.S65T}DC5, sn[+]	57080	116754	XM33B	XMSY071	No (Cell lethal)	Yes	Category A Increase number
Usp7	Ubiquitin-specific protease 7	FBgn0030366	Usp7[B]	p.Y474N	y[1] w[*] Usp7[B] P{ry[+t7.2]=neoFRT}19A / FM7c, P{w[+mC]=GAL4-Kr.C}DC1,P{w[+mC]=UAS-GFP.S65T}DC5, sn[+]	N/A (available upon request)	N/A (available upon request)	XE46B	XJSY088	Yes	No	No change
Usp7	Ubiquitin-specific protease 7	FBgn0030366	Usp7[A]	p.Q900X	y[1] w[*] Usp7[A] P{ry[+t7.2]=neoFRT}19A / FM7c, P{w[+mC]=GAL4-Kr.C}DC1,P{w[+mC]=UAS-GFP.S65T}DC5, sn[+]	N/A (lost)	N/A (lost)	XE46A	XBSY081	Yes	Yes	No change
Vps26	Vacuolar protein sorting 26	FBgn0014411	Vps26[B]	p.K264X	y[1] Vps26[B] w[*] P{ry[+t7.2]=neoFRT}19A / FM7c, P{w[+mC]=GAL4-Kr.C}DC1,P{w[+mC]=UAS-GFP.S65T}DC5, sn[+]	57140	117123	XE52B	XJSY110	Yes	Yes	No change
wapl	wings apart-like	FBgn0004655	wapl[A]	splice acceptor site	y[1] wapl[A] w[*] P{ry[+t7.2]=neoFRT}19A / FM7c, P{w[+mC]=GAL4-Kr.C}DC1,P{w[+mC]=UAS-GFP.S65T}DC5, sn[+]	52405	117116	XE31A	XJCB122	Yes	Yes	Inconsistent
wcy	wacky	FBgn0030812	wcy[E]	p.L467V	y[1] w[*] wcy[E] P{ry[+t7.2]=neoFRT}19A / FM7c, P{w[+mC]=GAL4-Kr.C}DC1, P{w[+mC]=UAS-GFP.S65T}DC5, sn[+]	N/A	116644	XM14A	XHZK103	No	Yes	No change
wcy	wacky	FBgn0030812	wcy[F]	p.W272X	y[1] w[*] wcy[F] P{ry[+t7.2]=neoFRT}19A / FM7c, P{w[+mC]=GAL4-Kr.C}DC1,P{w[+mC]=UAS-GFP.S65T}DC5, sn[+]	N/A	116762	XM14B	XMYF090	Yes	Yes	No change
wcy	wacky	FBgn0030812	wcy[A]	p.D192V, p.R229Q, p.K253X	y[1] w[*] wcy[A] P{ry[+t7.2]=neoFRT}19A / FM7c, P{w[+mC]=GAL4-Kr.C}DC1,P{w[+mC]=UAS-GFP.S65T}DC5, sn[+]	N/A	116767	XE14A	XASY045	Yes	Yes	No change
wcy	wacky	FBgn0030812	wcy[B]	deletion of a.a.590-760	y[1] w[*] wcy[B] P{ry[+t7.2]=neoFRT}19A / FM7c, P{w[+mC]=GAL4-Kr.C}DC1,P{w[+mC]=UAS-GFP.S65T}DC5, sn[+]	N/A	116811	XE14B	XFZK093	Yes	No	No change
Ykt6	YKT6 v-SNARE	FBgn0260858	Ykt6[A]	p.V60Dfs	y[1] w[*] Ykt6[A] P{ry[+t7.2]=neoFRT}19A / FM7c, P{w[+mC]=GAL4-Kr.C}DC1,P{w[+mC]=UAS-GFP.S65T}DC5, sn[+]	N/A (lost)	N/A (lost)	XE61A	XGVB004	Yes	No	No change
Zpr1	Zpr1	FBgn0030096	Zpr1[A]	p.C46S	y[1] w[*] Zpr1[A] P{ry[+t7.2]=neoFRT}19A / FM7c, P{w[+mC]=GAL4-Kr.C}DC1,P{w[+mC]=UAS-GFP.S65T}DC5, sn[+]	52409	116581	XM28A	XDSY006	No (Cell lethal)	Yes	No change
β-Spec	β Spectrin	FBgn0250788	β-Spec[B]	unidentified (mapped by complementation)	y[1] w[*] beta-Spec[B] P{ry[+t7.2]=neoFRT}19A / FM7c, P{w[+mC]=GAL4-Kr.C}DC1,P{w[+mC]=UAS-GFP.S65T}DC5, sn[+]	N/A	116779	XE08B	XDZK009	Yes	No	No change
β-Spec	β Spectrin	FBgn0250788	β-Spec[D]	unidentified (mapped by complementation)	y[1] w[*] beta-Spec[D] P{ry[+t7.2]=neoFRT}19A / FM7c, P{w[+mC]=GAL4-Kr.C}DC1,P{w[+mC]=UAS-GFP.S65T}DC5, sn[+]	N/A	116813	XE08D	XGSY123	Yes	Yes	No change
? (Unmapped, l(1)X1868)		N/A	l(1)X1868[A]	? (Unmapped)	l(1)X1868[A], y[1] w[*] P{ry[+t7.2]=neoFRT}19A / FM7c, P{w[+mC]=GAL4-Kr.C}DC1,P{w[+mC]=UAS-GFP.S65T}DC5, sn[+]	N/A	116825	XE18A	XGZK162	Yes	Yes	No change
? (Unmapped, l(1)X2499)		N/A	l(1)X2499[A]	? (Unmapped)	l(1)X2499[A], y[1] w[*] P{ry[+t7.2]=neoFRT}19A / FM7c, P{w[+mC]=GAL4-Kr.C}DC1,P{w[+mC]=UAS-GFP.S65T}DC5, sn[+]	N/A	117508	XE12A	XISY058	Yes	No	No change
? (Unmapped, l(1)XE39)		N/A	l(1)XE39[A]	? (Unmapped)	l(1)XE39[A], y[1] w[*] P{ry[+t7.2]=neoFRT}19A / FM7c, P{w[+mC]=GAL4-Kr.C}DC1,P{w[+mC]=UAS-GFP.S65T}DC5, sn[+]	N/A	117067	XE39A	XGSY085	Yes	No	No change
? (Unmapped, l(1)XE39)		N/A	l(1)XE39[A]	? (Unmapped)	l(1)XE39[B], y[1] w[*] P{ry[+t7.2]=neoFRT}19A / FM7c, P{w[+mC]=GAL4-Kr.C}DC1,P{w[+mC]=UAS-GFP.S65T}DC5, sn[+]	N/A	117161	XE39B	XKYF009	Yes	No	No change
? (Unmapped, l(1)XE47)		N/A	l(1)XE47[B]	? (Unmapped)	l(1)XE47[B], y[1] w[*] P{ry[+t7.2]=neoFRT}19A / FM7c, P{w[+mC]=GAL4-Kr.C}DC1,P{w[+mC]=UAS-GFP.S65T}DC5, sn[+]	N/A	117036	XE47B	XDVB135	Yes	Yes	Inconsistent
? (Unmapped, l(1)XE47)		N/A	l(1)XE47[A]	? (Unmapped)	l(1)XE47[A], y[1] w[*] P{ry[+t7.2]=neoFRT}19A / FM7c, P{w[+mC]=GAL4-Kr.C}DC1,P{w[+mC]=UAS-GFP.S65T}DC5, sn[+]	N/A	117164	XE47A	XKZK031	Yes	No	Inconsistent
? (unmapped, l(1)XE58)		N/A	l(1)XE58[B]	? (Unmapped)	l(1)XE58[B], y[1] w[*] P{ry[+t7.2]=neoFRT}19A / FM7c, P{w[+mC]=GAL4-Kr.C}DC1,P{w[+mC]=UAS-GFP.S65T}DC5, sn[+]	N/A	117102	XE58B	XISY198	Yes	No	No change
? (unmapped, l(1)XE58)		N/A	l(1)XE58[A]	? (Unmapped)	l(1)XE58[A], y[1] w[*] P{ry[+t7.2]=neoFRT}19A / FM7c, P{w[+mC]=GAL4-Kr.C}DC1,P{w[+mC]=UAS-GFP.S65T}DC5, sn[+]	N/A	117196	XE58A	XMAJ131	Yes	No	No change
? (unmapped, l(1)XG10		N/A	l(1)XG10[A]	? (Unmapped)	l(1)XG10[A], y[1] w[*] P{ry[+t7.2]=neoFRT}19A / FM7c, P{w[+mC]=GAL4-Kr.C}DC1,P{w[+mC]=UAS-GFP.S65T}DC5, sn[+]	N/A	116863	XG10A	XJCB112	No (No eclosion)	Yes	No change
? (unmapped, l(1)XG10		N/A	l(1)XG10[B]	? (Unmapped)	l(1)XG10[B], y[1] w[*] P{ry[+t7.2]=neoFRT}19A / FM7c, P{w[+mC]=GAL4-Kr.C}DC1,P{w[+mC]=UAS-GFP.S65T}DC5, sn[+]	N/A	116896	XG10B	XKMJ232	Data Not Available	Yes	No change

## Sheet: Supplemental table 2
Gene Symbol	Gene Name	FlyBase Gene ID	Allele Name	Pex-Screen Results	Human genes	DIOPT Score
AMPKα	AMP-activated protein kinase α subunit	FBgn0023169	AMPKα[A]	No change	PRKAA2	10
			AMPKα[F]	No change	PRKAA1	8
AP-1γ	Adaptor Protein complex 1, γ subunit	FBgn0030089	AP-1γ[B]	No change	AP1G1	9
			AP-1γ[D]	Inconsistent	AP1G2	8
arm	armadillo	FBgn0000117	arm[A]	No change	CTNNB1	11
			arm[B]	No change	JUP	7
			arm[H]	No change
ATP7	ATP7	FBgn0030343	ATP7[A]	No change	ATP7B	10
ATP7			ATP7[B]	No change	ATP7A	9
baz	bazooka	FBgn0000163	baz[A]	No change	PARD3	10
baz			baz[B]	No change	PARD3B	7
ben	bendless	FBgn0000173	ben[A]	No change	UBE2N	10
ben			ben[B]	No change	UBE2NL	7
br	broad	FBgn0283451	br[C]	No change	DIOPT Score less than 4
br			br[XD]	No change
br			br[A]	No change
br			br[B]	No change
br			br[F]	No change
br			br[G]	No change
cac	cacophony	FBgn0263111	cac[B]	No change	CACNA1B	9
cac			cac[I]	No change	CACNA1A	8
cac					CACNA1E	8
CDC45L	CDC45L	FBgn0026143	CDC45L[A]	Inconsistent
Cdk7	Cyclin-dependent kinase 7	FBgn0263237	Cdk7[D]	No change	CDK7	10
Cdk7			Cdk7[B]	No change
Cdk7			Cdk7[A]	No change
CG13365		FBgn0029529	CG13365[A]	No change	No ortholog result
CG13365			CG13365[B]	No change
CG14442		FBgn0029893	CG14442[B]	No change	DIOPT Score less than 4
CG14442			CG14442[A]	No change
CG17829		FBgn0025635	CG17829[A]	Category A Increase number	HINFP	8
CG17829			CG17829[B]	Category A Increase number
CG2918		FBgn0023529	CG2918[D]	No change	HYOU1	11
CG3149		FBgn0027564	CG3149[A]	No change	RFT1	9
CG3149			CG3149[B]	Category A Increase number
CG32694		FBgn0052694	CG32694[C]	No change	No ortholog result
CG32694			CG32694[B]	No change
CG32795		FBgn0040384	CG32795[A]	Inconsistent	TMEM120B	9
CG32795			CG32795[B]	Inconsistent	TMEM120A	7
CG34401		FBgn0085430	CG34401[D]	No change	ZSWIM8	9
CG4078		FBgn0029798	CG4078[B]	No change	RTEL1	10
CG4407		FBgn0030431	CG4407[B]	No change	FLAD1	9
CG6891		FBgn0030955	CG6891[A]	No change	COTL1	7
CG7065		FBgn0030091	CG7065[B]	No change	DIOPT Score less than 4
CG7065			CG7065[A]	No change
CKlIβ	Casein kinase II β subunit	FBgn0000259	CKIlβ[A]	Inconsistent	CSNK2B	9
CKIlβ			CKIlβ[D]	No change
CKIα	Casein kinase Iα	FBgn0015024	CKIα[B]	No change	CSNK1A1	12
					CSNK1A1L	9
Coq7	Coenzyme Q7	FBgn0029502	Coq7[B]	Category A Increase number	COQ7	8
Coq7			Coq7[C]	No change
Coq8	Coenzyme Q8	FBgn0052649	Coq8[A]	Category A Increase number	COQ8B	n/a
Coq8			Coq8[B]	Category A Increase number
Cp7Fb	Chorion protein b at 7F	FBgn0014465	Cp7Fb[B]	Category A Increase number	No ortholog result
Crag	Calmodulin-binding protein related to a Rab3 GDP/GTP exchange protein	FBgn0025864	Crag[C]	No change	DENND4A	10
					DENND4C	9
					DENND4B	8
dlg	discs large 1	FBgn0001624	dlg[A]	No change	DLG1	11
					DLG4	9
dlg			dlg[B]	No change	DLG2	8
					DLG3	7
Dlic	Dynein light intermediate chain	FBgn0030276	Dlic[B]	No change	DYNC1LI2	10
Dlic			Dlic[C]	No change	DYNC1LI1	10
dor	deep orange	FBgn0000482	dor[A]	No change	VPS18	11
dor			dor[C]	No change
dsh	dishevelled	FBgn0000499	dsh[A]	Inconsistent	DVL2	10
					DVL3	10
dsh			dsh[B]	No change	DVL1	7
Dsor1	Downstream of raf1	FBgn0010269	Dsor1[B]	No change	MAP2K1	12
Dsor1			Dsor1[A]	No change	MAP2K2	11
dwg	deformed wings	FBgn0000520	dwg[A]	No change	DIOPT Score less than 4
dwg		FBgn0000520	dwg[B]	No change
elav	embryonic lethal abnormal vision	FBgn0260400	elav[A]	No change	ELAVL2	6
elav					ELAVL1	6
elav					ELAVL3	6
elav			elav[B]	No change	ELAVL4	6
ewg	erect wing	FBgn0005427	ewg[A]	No change	NRF1	9
ewg			ewg[B]	No change
Flacc	Fl(2)d-associated complex component	FBgn0030974	Flacc[E]	No change	No ortholog result
Flacc			Flacc[C]	No change
Flacc			Flacc[A]	No change
Flacc			Flacc[B]	No change
fs[1]h	female sterile (1) homeotic	FBgn0004656	fs[1]h[C]	Category B Enlargement AND Category A	BRDT	7
fs[1]h			fs[1]h[A]	Category B Enlargement AND Category A	BRD2	7
fs[1]h					BRD3	7
fs[1]h			fs[1]h[B]	Category B Enlargement AND Category A	BRD4	7
Fum1	Fumarase 1	FBgn0286222	Fum1[B]	No change	FH	n/a
Fum1			Fum1[A]	Category A Increase number
fzr	fizzy-related	FBgn0262699	fzr[A]	No change	FZR1	12
fzr			fzr[B]	No change
GCS1	Glucosidase 1	FBgn0030289	GCS1[A]	Inconsistent	MOGS	11
GCS1			GCS1[B]	No change
Gtp-bp	GTP-binding protein	FBgn0010391	Gtp-bp[A]	No change	SRPR	11
Gtp-bp			Gtp-bp[B]	No change
hop	hopscotch	FBgn0004864	hop[A]	No change	JAK1	8
hop					JAK2	8
hop			hop[C]	No change	JAK3	6
hop					TYK2	6
Hr4	Hormone receptor 4	FBgn0264562	Hr4[B]	No change	NR6A1	7
kdn	knockdown	FBgn0261955	kdn[A]	No change	CS	9
kdn			kdn[C]	No change
Lrpprc2	Leucine-rich pentatricopeptide repeat containing 2	FBgn0027794	Lrpprc2[A]	No change	LRPPRC	5
Lrpprc2			Lrpprc2[B]	No change
Marf	Mitochondrial assembly regulatory factor	FBgn0029870	Marf[A]	No change	MFN2	11
Marf			Marf[B]	Inconsistent
Marf			Marf[H]	No change	MFN1	9
Marf			Marf[G]	No change
Mcm6	Minichromosome maintenance 6	FBgn0025815	Mcm6[B]	No change	MCM6	10
Mcm6			Mcm6[D]	No change
mldr	mulder	FBgn0029858	mldr[A]	No change	KIAA0391	9
mldr			mldr[B]	No change
mldr			mldr[D]	No change
mRNA-cap	mRNA-capping-enzyme	CG1810	mRNA-cap[A]	No change	RNGTT	10
MTPAP	mitochondrial poly(A) polymerase	FBgn0024360	MTPAP[A]	Category A Increase number	MTPAP	8
MTPAP			MTPAP[B]	Category A Increase number
mxc	multi sex combs	FBgn0260789	mxc[F]	Category A Increase number	No ortholog result
mxc			mxc[C]	Category A Increase number
mxc			mxc[D]	Category A Increase number
mxc			mxc[A]	Category A Increase number
mxc			mxc[B]	Category A Increase number
mxc			mxc[E]	Category A Increase number
mys	myospheroid	FBgn0004657	mys[J]	No change	ITGB1	11
					ITGB2	7
					ITGB7	7
					ITGB3	5
					ITGB4	4
					ITGB5	4
					ITGB6	4
N	Notch	FBgn0004647	N[XB]	No change	NOTCH1	10
N					NOTCH2	8
N			N[XE]	No change	NOTCH3	8
N					NOTCH4	5
nej	nejire	FBgn0261617	nej[B]	No change	CREBBP	10
nej			nej[A]	No change	EP400	10
Nrd1	Nardilysin	FBgn0030344	Nrd1[D]	Inconsistent	NRD1	9
Nrd1			Nrd1[E]	No change
Nrd1			Nrd1[W369X]	No change	IDE	4
Nrd1			Nrd1[Q376X]	No change
Nrg	Neuroglian	FBgn0264975	Nrg[XA]	Inconsistent	NRCAM	9
Nrg					NFASC	7
Nrg			Nrg[XB]	Category A Increase number	L1CAM	6
Nrg					CHL1	6
oc	ocelliless	FBgn0004102	oc[D]	No change	OTX1	7
oc			oc[B]	No change
oc			oc[A]	No change	OTX2	5
pck	pickel	FBgn0013720	pck[A]	No change	NO ortholog result
Pdha	Pyruvate dehydrogenase E1 alpha subunit	FBgn0028325	Pdha[A]	No change	No ortholog result
Pdha			Pdha[B]	No change
PI4KIIIα	Phosphatidylinositol 4-kinase III α	FBgn0267350	PI4KIIIα[S]	No change	PI4K4	8
PI4KIIIα			PI4KIIIα[T]	No change
PI4KIIIα			PI4KIIIα[V]	No change
PI4KIIIα			PI4KIIIα[W]	Category A Increase number
PI4KIIIα			PI4KIIIα[D]	No change
PI4KIIIα			PI4KIIIα[E]	Category A Increase number
PI4KIIIα			PI4KIIIalpha[B]	No change
por	porcupine	FBgn0004957	por[E]	No change	PORCN	10
por			por[A]	No change
PpV	Protein phosphatase V	FBgn0003139	PpV[H]	No change	PPP6C	11
PpV			PpV[D]	No change
Ppv			PpV[E]	No change
Ppv			PpV[B]	No change
Ppv			Ppv[A]	No change
Ppv			Ppv[C]	No change
Ppv			PpV[J]	No change
Raf	Raf oncogene	FBgn0003079	Raf[E]	No change	BRAF	11
Raf			Raf[A]	No change	ARAF	10
Raf			Raf[B]	No change	RAF1	9
Rbcn-3A	Rabconnectin-3A	FBgn0023458	Rbcn-3A[A]	No change	DMXL2	10
Rbcn-3A			Rbcn-3A[B]	No change
Rbcn-3A			Rbcn-3A[G]	No change	DMXL1	7
Rbcn-3A			Rbcn-3A[H]	No change
Rbcn-3B	Rabconnectin-3B	FBgn0023510	Rbcn-3B[A]	Category A Increase number	WDR7	11
Rbcn-3B	Rabconnectin-3B	FBgn0023510	Rbcn-3B[B]	Category A Increase number	WDR72	5
Rbf	Retinoblastoma-family protein	FBgn0015799	Rbf[B]	No change	RBL2	11
					RBL1	10
RpII215	RNA polymerase II 215kD subunit	FBgn0003277	RpII215[A]	No change	POLR2A	10
RpII215			RpII215[E]	No change
schlank	schlank	FBgn0040918	schlank[A]	No change	CERS5	10
					CERS6	9
			schlank[B]	No change	CERS2	8
schlank					CERS4	7
schlank			schlank[C]	No change	CERS3	6
scu	scully	FBgn0021765	scu[A]	No change	HSD17B10	11
scu			scu[B]	No change
sgg	shaggy	FBgn0003371	sgg[C]	Inconsistent	GSK3A	8
sgg			sgg[E]	Category A Increase number
sgg			sgg[A]	Category A Increase number	GSK3B	8
sgg			sgg[B]	Category A Increase number
shi	shibire	FBgn0003392	shi[C]	Inconsistent	DNM1	11
					DNM2	10
shi			shi[E]	No change	DNM3	9
sicily	severe impairment of CI with lengthened youth	FBgn0030352	sicily[A]	No change	NDUFAF6	10
sicily			sicily[B]	No change
SMC3	Structural maintenance of chromosomes 3	FBgn0015615	SMC3[A]	No change	SMC3	9
Smox	Smad on X	FBgn0025800	Smox[A]	No change	SMAD3	10
Smox			Smox[B]	Category A Increase number	SMAD2	8
Smr	Smrter	FBgn0265523	Smr[A]	No change	NCOR1	8
Smr			Smr[M]	No change
Smr			Smr[F]	No change	NCOR2	7
Sp1	Sp1	FBgn0020378	Sp1[A]	No change	SP9	8
Sp1			Sp1[B]	No change	SP8	7
temp	tempura	FBgn0027296	temp[D]	Category A Increase number	PTAR1	8
temp			temp[A]	Category A Increase number
temp			temp[B]	Category A Increase number
temp			temp[C]	No change
tko	technical knockout	FBgn0003714	tko[A]	No change	MRPS12	11
tko			tko[B]	No change
trr	trithorax-related	FBgn0023518	trr[A]	No change	KMT2C	6
trr			trr[B]	No change	KMT2D	5
Uba5	Ubiquitin activating enzyme 5	FBgn0030305	Uba5[B]	No change	UBA5	11
Uba5			Uba5[A]	No change
Ubr3	Ubr3 ubiquitin ligase	FBgn0260970	Ubr3[A]	No change	UBR3	8
Ubr3			Ubr3[B]	No change
Upf1	Upf1	FBgn0030354	Upf1[A]	Category A Increase number	UPF1	10
Upf1			Upf1[B]	Category A Increase number
Upf2	Upf2	FBgn0029992	Upf2[A]	Category A Increase number	UPF2	10
Upf2			Upf2[B]	Category A Increase number
Usp16-45	Ubiquitin specific protease 16/45	FBgn0029763	Usp16-45[A]	Category A Increase number	USP45	7
Usp16-45			Usp16-45[B]	Category A Increase number	USP16	5
Usp7	Ubiquitin-specific protease 7	FBgn0030366	Usp7[B]	No change	USP7	8
Usp7			Usp7[A]	No change
Vps26	Vacuolar protein sorting 26	FBgn0014411	Vps26[B]	No change	VPS26B	9
					VPS26A	8
wapl	wings apart-like	FBgn0004655	wapl[A]	Inconsistent	WAPAL	7
wcy	wacky	FBgn0030812	wcy[E]	No change	WAC	8
wcy			wcy[F]	No change
wcy			wcy[A]	No change
wcy			wcy[B]	No change
Ykt6	YKT6 v-SNARE	FBgn0260858	Ykt6[A]	No change	YKT6	11
Zpr1	Zpr1	FBgn0030096	Zpr1[A]	No change	ZNF259	9
β-Spec	β Spectrin	FBgn0250788	β-Spec[B]	No change	SPTBN1	11
					SPTBN2	9
β-Spec			β-Spec[D]	No change	SPTB	7
					SPTBN4	7
? (Unmapped, l(1)X1868)		N/A	l(1)X1868[A]	No change
? (Unmapped, l(1)X2499)		N/A	l(1)X2499[A]	No change
? (Unmapped, l(1)XE39)		N/A	l(1)XE39[A]	No change
? (Unmapped, l(1)XE39)		N/A	l(1)XE39[A]	No change
? (Unmapped, l(1)XE47)		N/A	l(1)XE47[B]	Inconsistent
? (Unmapped, l(1)XE47)		N/A	l(1)XE47[A]	Inconsistent
? (unmapped, l(1)XE58)		N/A	l(1)XE58[B]	No change
? (unmapped, l(1)XE58)		N/A	l(1)XE58[A]	No change
? (unmapped, l(1)XG10		N/A	l(1)XG10[A]	No change
? (unmapped, l(1)XG10		N/A	l(1)XG10[B]	No change

## Sheet: Supplemental table 3
Human genes	DIOPT Score	HGNC_ID	OMIM_ID	OMIM_disease	pLI	pLI-o/e	Missense Z score	Missense Z score-o/e	Domino			Human genes	DIOPT Score	HGNC_ID	OMIM_ID	OMIM_disease	pLI	pLI-o/e	Missense Z score	Missense Z score-o/e	Domino
BRD2	7	1103	* 601540	No OMIM entry	1	0.08 (0.04 - 0.22)	0.59	0.92 (0.85 - 1.00)	0.474			AP1G1	9	555	* 603533	No OMIM entry	1	0.1 (0.05 - 0.20)	2.98	0.61 (0.55 - 0.67)	0.959
BRD4	7	13575	* 608749	No OMIM entry	1	0 (0.00 - 0.05)	3.59	0.64 (0.60 - 0.69)	0.997			ATP7A	9	869	* 300011	# 309400, # 304150, # 300489	1	0.09 (0.04 - 0.22)	1.53	0.82 (0.76 - 0.88	0.994
GSK3A	8	4616	* 606784	No OMIM entry	1	0 (0.00 - 0.13	3.22	0.42 (0.36 - 0.50)	1			BRAF	11	1097	* 164757	# 211980, # 115150, # 613707, # 613706	1	0.1 (0.05 - 0.21)	3.72	0.49 (0.43 - 0.55)	0.893
L1CAM	6	6470	* 308840	# 304100, # 303350, # 307000	1	0.04 (0.02 - 0.13)	2.84	0.66 (0.61 - 0.72)	n/a			CACNA1A	8	1388	* 601011	# 617106, # 108500, # 141500, # 183086	1	0.08 (0.04 - 0.13)	5.78	0.58 (0.54 - 0.61)	0.995
MTPAP	8	25532	* 613669	# 613672	1	0.04 (0.01 - 0.19)	0.95	0.85 (0.77 - 0.94)	0.242			CREBBP	10	2348	* 600140	# 618332, # 180849	1	0.03 (0.01 - 0.07)	3.9	0.71 (0.67 - 0.75)	1
NFASC	7	29866	* 609145	# 618356	1	0.12 (0.07 - 0.21)	2.59	0.74 (0.69 - 0.79)	0.871			CSNK1A1	12	2451	* 600505	No OMIM entry	1	0.05 (0.01 - 0.21)	4.3	0.14 (0.10 - 0.19)	1
UPF1	10	9962	* 601430	No OMIM entry	1	0.07 (0.03 - 0.16)	5.63	0.41 (0.37 - 0.45)	0.996			CTNNB1	11	2514	* 116806	# 114500, # 617572, # 114550, # 155255,# 155255, # 615075, # 167000, # 132600	1	0.03 (0.01 - 0.13)	3.85	0.47 (0.42 - 0.53)	1
UPF2	10	17854	* 605529	No OMIM entry	1	0.03 (0.01 - 0.10)	3.19	0.65 (0.60 - 0.71)	0.723			DLG4	9	2903	* 602887	No OMIM entry	1	0.11 (0.06 - 0.24)	4.93	0.36 (0.32 - 0.41)	1
BRD3	7	1104	* 601541	No OMIM entry	0.97	0.14 (0.07 - 0.32)	2.64	0.65 (0.59 - 0.72)	0.893			DNM1	11	2972	* 602377	# 616346	1	0.13 (0.07 - 0.25)	5.18	0.35 (0.31 - 0.40)	0.993
GSK3B	8	4617	* 605004	No OMIM entry	0.96	0.15 (0.07 - 0.33)	2.8	0.49 (0.42 - 0.57	1			DNM2	10	2974	* 602378	# 160150, # 606482, # 615368	1	0.07 (0.03 - 0.18)	3.48	0.57 (0.52 - 0.63)	0.966
PTAR1	8	30449	No OMIM entry	No OMIM entry	0.86	0.15 (0.07 - 0.39)	1.44	0.72 (0.63 - 0.82)	0.275			ELAVL2	6	3313	* 601673	No OMIM entry	1	0 (0.00 - 0.19	1.29	0.74 (0.65 - 0.85)	0.953
SMAD3	10	6769	* 603109	# 613795	0.8	0.17 (0.09 - 0.40)	3.48	0.38 (0.33 - 0.46)	0.999			EP400	10	11958	* 606265	No OMIM entry	1	0.15 (0.10 - 0.21)	2.56	0.83 (0.80 - 0.87)	0.996
FH	n/a	3700	* 136850	# 606812, # 150800	0.09	0.28 (0.15 - 0.54)	1.27	0.79 (0.7 - 0.88)	0.371			FZR1	12	24824	* 603619	No OMIM entry	1	0.04 (0.01 - 0.17)	3.64	0.43 (0.38 - 0.50)	0.985
HINFP	8	17850	* 607099	No OMIM entry	0.04	0.28 (0.17 - 0.51)	1.68	0.73 (0.65 - 0.81)	0.719			JAK1	8	6190	* 147795	No OMIM entry	1	0.11 (0.06 - 0.21)	4.61	0.5 (0.45 - 0.55	1
NRCAM	9	7994	* 601581	No OMIM entry	0.02	0.26 (0.18 - 0.38)	1.91	0.8 (0.74 - 0.85)	0.191			KMT2C	6	13726	* 606833	# 617768	1	0.08 (0.06 - 0.12)	2.14	0.88 (0.85 - 0.91)	0.801
BRDT	7	1105	* 602144	# 617644	0	0.46 (0.33 - 0.66)	0.46	0.94 (0.87 - 1.02)	0.991			KMT2D	5	7133	* 602113	# 147920	1	0.07 (0.04 - 0.10)	3.73	0.81 (0.79 - 0.84)	0.998
CHL1	6	1939	* 607416	No OMIM entry	0	0.47 (0.35 - 0.64)	-1.92	1.21 (1.14 - 1.29)	0.152			NCOR2	7	7673	* 600848	No OMIM entry	1	0.1 (0.06 - 0.17	2.01	0.86 (0.82 - 0.90)	0.999
COQ7	8	2244	* 601683	# 616733	0	0.86 (0.52 - 1.49)	-0.46	1.11 (0.97 - 1.27)	0.091			NOTCH1	10	7881	* 190198	# 616028, # 109730	1	0.05 (0.02 - 0.10)	3.45	0.76 (0.73 - 0.80)	1
RFT1	9	30220	* 611908	# 612015	0	0.77 (0.56 - 1.09)	0.97	0.84 (0.76 - 0.94)	0.063			NOTCH2	8	7882	* 600275	# 610205, # 102500	1	0.06 (0.03 - 0.12)	3.5	0.73 (0.69 - 0.77)	0.999
USP45	7	20080	No OMIM entry	No OMIM entry	0	0.78 (0.59 - 1.06)	0.64	0.91 (0.83 - 0.99)	0.168			NRF1	9	7996	* 600879	No OMIM entry	1	0.04 (0.01 - 0.19)	4.51	0.27 (0.23 - 0.33)	0.925
WDR7	11	13490	* 613473	No OMIM entry	0	0.84 (0.66 - 1.07)	-0.96	1.11 (1.04 - 1.19)	0.636			POLR2A	10	9187	* 180660	No OMIM entry	1	0.08 (0.05 - 0.16)	7.13	0.42 (0.39 - 0.46)	1
COQ8B	n/a	19041	* 615567	# 615573	n/a	n/a	n/a	n/a	0.056			RBL2	11	9894	* 180203	No OMIM entry	1	0.15 (0.09 - 0.27	1.23	0.86 (0.80 - 0.92)	0.993
PI4K4	8	No entry	No OMIM entry	No OMIM entry	n/a	n/a	n/a	n/a	n/a			SMAD2	8	555	* 603533	No OMIM entry	1	0.1 (0.04 - 0.26)	3.66	0.35 (0.29 - 0.42)	1
												SMC3	9	2468	* 606062	# 610759	1	0 (0.00 - 0.04)	6.4	0.28 (0.25 - 0.32)	0.999
												SPTB	7	11274	* 182870	# 617948, # 616649	1	0.08 (0.05 - 0.14)	0.75	0.94 (0.90 - 0.99)	0.932
Note:												SPTBN1	11	11275	* 182790	No OMIM entry	1	0.04 (0.02 - 0.09)	4.54	0.66 (0.62 - 0.70)	1
gnomAD												USP7	8	12630	* 602519	No OMIM entry	1	0.01 (0.00 - 0.06)	5.65	0.36 (0.32 - 0.41)	0.989
pLI = probability of being loss-of-function intolerant_The closer pLI is to one, the more intolerant of protein-truncating variants the transcript appears to be. We consider pLI ? 0.9 as an extremely intolerant set of transcripts_												WAPAL	7	23293	* 610754	No OMIM entry	1	0.04 (0.01 - 0.11)	3.46	0.61 (0.56 - 0.67)	0.998
pLI-o/e = observed / expected (oe)_low oe values are indicative of strong intolerance = oe confidence interval < 0.35_tolerant (null) genes would have the expected amount of protein-truncating variation and then took the empirical observed/expected rate o												ZSWIM8	9	23528	No OMIM entry	No OMIM entry	1	0.06 (0.03 - 0.13)	5.14	0.56 (0.53 - 0.60)	0.934
Missense Z score = Positive Z scores indicate increased constraint (intolerance to variation) and therefore that the transcript had fewer variants than expected. Negative Z scores were given to transcripts that had more variants than expected_For the miss												CACNA1B	9	1389	* 601012	No OMIM entry	1	0.16 (0.11 - 0.24)	4.52	0.65 (0.61 - 0.69)	n/a
Missense Z score-o/e = observed / expected (oe)												CACNA1E	8	1392	* 601013	# 618285	1	0.07 (0.04 - 0.12)	5.81	0.56 (0.52 - 0.59)	n/a
Color scale for o/e: 0 to 1												DENND4A	10	24321	* 600382	No OMIM entry	1	0.18 (0.12 - 0.28)	3.67	0.66 (0.62 - 0.71)	0.129
	o/e < 0.2											DLG3	7	2902	* 300189	# 300850	1	0 (0.00 - 0.09)	2.88	0.56 (0.49 - 0.63)	0.538
	o/e < 0.4											DMXL1	7	2937	* 605671	No OMIM entry	1	0.14 (0.10 - 0.20	-0.49	1.04 (0.99 - 1.08)	0.597
	o/e < 0.6											DMXL2	10	2938	* 612186	# 617605, # 616113	1	0.1 (0.07 - 0.16)	2.37	0.83 (0.79 - 0.87)	0.315
	o/e >= 0.6											PORCN	10	17652	* 300651	# 305600	1	0 (0.00 - 0.14)	2.37	0.54 (0.46 - 0.63)	n/a
												SPTBN4	7	14896	* 606214	# 617519	1	0.12 (0.08 - 0.19)	3.93	0.7 (0.66 - 0.74)	0.462
Domino												UBR3	8	30467	* 613831	No OMIM entry	1	0.07 (0.04 - 0.13)	4.43	0.57 (0.52 - 0.61)	0.7
Domino score: probability of being AD_0 to 1												WAC	8	17327	* 615049	# 616708	1	0 (0.00 - 0.08	1.51	0.77 (0.69 - 0.85)	0.296
	Very likely dominant (0.8 to 1)											DLG1	11	2900	* 601014	No OMIM entry	0.99	0.17 (0.10 - 0.29)	1.5	0.81 (0.75 - 0.88)	0.996
	Likely dominant (0.6 to 0.7)											ELAVL1	6	3312	* 603466	No OMIM entry	0.99	0 (0.00 - 0.22)	3.81	0.28 (0.23 - 0.35)	0.998
	Either dominant or recessive: (0.4 to 0.5)											MFN2	11	16877	* 608507	# 609260, # 617087, # 601152	0.99	0.13 (0.07 - 0.28)	1.66	0.77 (0.70 - 0.85)	0.799
	Likely recessive (0.2 to 0.3)											CS	9	2422	* 118950	No OMIM entry	0.98	0.13 (0.06 - 0.30)	3.33	0.42 (0.35 - 0.49)	0.97
	Very likely recessive(0 to 0.1)											DYNC1LI2	10	2966	* 611406	No OMIM entry	0.98	0.12 (0.05 - 0.30)	1.89	0.68 (0.60 - 0.77)	0.923
												ITGB1	11	6153	* 135630	No OMIM entry	0.98	0.15 (0.08 - 0.31)	3.46	0.53 (0.47 - 0.59)	0.996
ASD_Autism												MCM6	10	6949	* 601806	# 223100	0.98	0.16 (0.09 - 0.31)	1.07	0.86 (0.79 - 0.93)	0.507
CHD_Congenital Heart Disease												NR6A1	7	7985	* 602778	No OMIM entry	0.98	0.12 (0.05 - 0.30)	1.83	0.68 (0.60 - 0.77)	0.559
DD/ID_Developmental Disability/Intellectual Disability												MAP2K2	11	6842	* 601263	# 615280	0.97	0.1 (0.04 - 0.33)	1.87	0.67 (0.59 - 0.76)	0.926
SCZ_Schizophrenia												SP8	7	19196	* 608306	No OMIM entry	0.97	0 (0.00 - 0.28)	1.69	0.7(0.61 - 0.79)	0.863
												VPS26B	9	28119	* 610027	No OMIM entry	0.97	0.07 (0.02 - 0.32)	2.02	0.62 (0.53 - 0.71)	0.884
												DYNC1LI1	10	18745	* 615890	No OMIM entry	0.96	0.14 (0.07 - 0.33)	1.04	0.82 (0.73 - 0.92)	0.98
												PARD3	10	16051	* 606745	No OMIM entry	0.96	0.2 (0.13 - 0.31)	1.04	0.9 (0.84 - 0.95)	0.998
												ARAF	10	646	* 311010	No OMIM entry	0.96	0.13 (0.06 - 0.33)	2.45	0.58 (0.51 - 0.67)	0.1
												HSD17B10	11	4800	* 300256	No OMIM entry	0.94	0 (0.00 - 0.34)	2.59	0.31 (0.24 - 0.41)	n/a
												SP9	8	30690	No OMIM entry	No OMIM entry	0.94	0 (0.00 - 0.34)	2.26	0.55 (0.47 - 0.64)	0.652
												CSNK2B	9	2460	* 115441	No OMIM entry	0.92	0.08 (0.03 - 0.38)	3.13	0.21 (0.16 - 0.30)	0.835
												OTX2	5	8522	* 600037	# 610125, # 613986, # 610125	0.92	0.08 (0.03 - 0.38)	1.05	0.77 (0.66 - 0.89)	0.989
												ELAVL4	6	3315	* 168360	No OMIM entry	0.91	0.12 (0.05 - 0.38)	2.85	0.46 (0.39 - 0.54)	0.999
												MAP2K1	12	6840	* 176872	# 615279	0.9	0.15 (0.07 - 0.38)	3.11	0.41 (0.34 - 0.48)	1
												UBE2N	10	12492	* 603679	No OMIM entry	0.88	0 (0.00 - 0.43)	2.51	0.24 (0.17 - 0.35)	0.998
												OTX1	7	8521	* 600036	No OMIM entry	0.86	0.09 (0.03 - 0.44)	1.39	0.73 (0.64 - 0.84)	0.944
												HYOU1	11	16931	* 601746	# 233600	0.86	0.2 (0.13 - 0.33)	1.8	0.79 (0.73 - 0.85)	0.618
												RAF1	9	9829	* 164760	# 615916, # 611554, # 611553	0.85	0.19 (0.11 - 0.35)	2.46	0.64 (0.57 - 0.71)	1
												SRPR	11	11307	* 182180	No OMIM entry	0.78	0.19 (0.10 - 0.39)	1.17	0.83 (0.76 - 0.92)	0.967
												ELAVL3	6	3314	* 603458	No OMIM entry	0.77	0.15 (0.06 - 0.46)	3	0.46 (0.40 - 0.54	0.874
												DLG2	8	2901	* 603583	No OMIM entry	0.71	0.21 (0.14 - 0.34)	2.08	0.75 (0.69 - 0.81)	0.994
												JAK2	8	6192	* 147796	# 133100, # 601626, # 254450, # 263300, # 614521, # 600880	0.65	0.21 (0.14 - 0.34)	0.9	0.9 (0.83 - 0.96)	0.994
												VPS26A	8	12711	* 605506	No OMIM entry	0.61	0.19 (0.08 - 0.48)	1.56	0.66 (0.56 - 0.77)	0.843
												CERS2	8	14076	* 606920	No OMIM entry	0.48	0.22 (0.12 - 0.43)	1.76	0.68 (0.59 - 0.77)	0.85
												VPS18	11	15972	*15972	No OMIM entry	0.48	0.22 (0.13 - 0.40)	0.63	0.93 (0.86 - 0.99)	0.699
												NOTCH3	8	7883	* 600276	# 615293, # 125310, # 130720	0.41	0.23 (0.16 - 0.32	3.53	0.74 (0.70 - 0.77)	0.995
												DVL3	10	3087	* 601368	# 616894	0.39	0.22 (0.13 - 0.42)	2.32	0.7 (0.65 - 0.77)	1
												RNGTT	10	10073	* 603512	No OMIM entry	0.37	0.23 (0.13 - 0.41)	3	0.53 (0.47 - 0.60)	0.383
												YKT6	11	16959	* 606209	No OMIM entry	0.36	0.23 (0.10 - 0.58)	0.99	0.74 (0.62 - 0.89)	0.481
												PRKAA1	8	9376	* 602739	No OMIM entry	0.14	0.25 (0.14 - 0.48)	2.49	0.6 (0.54 - 0.68)	0.749
												NRD1	9	7995	* 602651	No OMIM entry	0.04	0.25 (0.17 - 0.37)	2.56	0.71 (0.66 - 0.77)	0.832
												CERS6	9	23826	* 615336	No OMIM entry	0.04	0.28 (0.17 - 0.51)	0.66	0.87 (0.78 - 0.99)	0.686
												COTL1	7	18304	* 606748	No OMIM entry	0.04	0.46 (0.21 - 1.18)	-0.13	1.04 (0.88 - 1.22)	0.114
												UBE2NL	7	31710	No OMIM entry	No OMIM entry	0.02	1.67 (0.48 - 1.93)	0.19	0.93 (0.75 - 1.16)	-
												CERS3	6	23752	* 615276	# 615023	0.01	0.35 (0.20 - 0.63)	0.61	0.88 (0.78 - 0.99)	0.14
												CSNK1A1L	9	20289	No OMIM entry	No OMIM entry	0.01	0.5 (0.25 - 1.15)	0.17	0.96 (0.85 - 1.09)	0.44
												FLAD1	9	24671	* 610595	# 255100	0.01	0.33 (0.19 - 0.59)	0.58	0.91 (0.83 - 1.00	0.25
												IDE	4	5381	* 146680	No OMIM entry	0.01	0.27 (0.18 - 0.41)	2.08	0.75 (0.69 - 0.81)	0.368
												TMEM120B	9	32008	* 616551	No OMIM entry	0.01	0.34 (0.20 - 0.61)	0.97	0.8 (0.71 - 0.92)	0.089
												DVL1	7	3084	* 601365	# 616331	0	0.47 (0.31 - 0.73)	-1.13	1.14 (1.07 - 1.23	0.913
												DVL2	10	3086	* 602151	No OMIM entry	0	0.42 (0.28 - 0.66)	0.32	0.96 (0.89 - 1.04)	0.982
												ITGB3	5	6156	* 173470	# 187800, # 273800, # 608446	0	0.32 (0.20 - 0.52)	1.16	0.84 (0.77 - 0.92)	0.828
												JAK3	6	6193	* 600173	# 600802	0	0.36 (0.25 - 0.53)	2.81	0.7 (0.65 - 0.75)	0.907
												JUP	7	6207	* 173325	# 611528, # 601214	0	0.35 (0.22 - 0.59)	1.32	0.83 (0.76 - 0.90)	0.939
												MRPS12	11	10380	* 603021	No OMIM entry	0	1.23 (0.61 - 1.89)	0.42	0.88 (0.74 - 1.05)	0.869
												NOTCH4	5	7884	* 164951	No OMIM entry	0	0.59 (0.47 - 0.74)	2.14	0.82 (0.78 - 0.87)	0.938
												RBL1	10	6768	* 601366	No OMIM entry	0	0.52 (0.38 - 0.71)	1.22	0.86 (0.80 - 0.92)	0.811
												SPTBN2	9	11276	* 604985	# 600224	0	0.27 (0.20 - 0.36)	2.63	0.81 (0.77 - 0.85)	0.983
												AP1G2	8	556	* 603534	No OMIM entry	0	0.96 (0.75 - 1.23	0.39	0.95 (0.88 - 1.03)	0.083
												ATP7B	10	870	* 606882	# 277900	0	0.93 (0.74 - 1.19)	-0.88	1.09 (1.03 - 1.15)	0.474
												CDK7	10	1778	* 601955	No OMIM entry	0	0.64 (0.42 - 1.02)	1.94	0.59 (0.51 - 0.70)	0.37
												CERS4	7	2374	* 615334	No OMIM entry	0	1.24 (0.93 - 1.68)	-0.75	1.14 (1.03 - 1.26)	0.331
												CERS5	10	23749	* 615335	No OMIM entry	0	0.64 (0.44 - 0.96)	1.19	0.77 (0.68 - 0.88)	0.117
												DENND4C	9	26079	No OMIM entry	No OMIM entry	0	0.32 (0.23 - 0.45)	-0.65	1.06 (1.00 - 1.12)	0.079
												DNM3	9	29125	* 611445	No OMIM entry	0	0.3 (0.20 - 0.48)	2.7	0.65 (0.59 - 0.72)	0.446
												ITGB2	7	6155	* 600065	# 116920	0	0.72 (0.53 - 0.99)	0.77	0.9 (0.83 - 0.98)	0.122
												ITGB4	4	6158	* 147557	# 131800, # 226650, # 226730	0	0.51 (0.40 - 0.65)	0.37	0.97 (0.92 - 1.02)	0.281
												ITGB5	4	6160	* 147561	No OMIM entry	0	0.48 (0.33 - 0.71)	1.06	0.86 (0.79 - 0.94)	0.415
												ITGB6	4	6161	* 147558	# 616221	0	0.93 (0.71 - 1.23)	-0.69	1.09 (1.01 - 1.18)	0.762
												ITGB7	7	6162	* 14755	No OMIM entry	0	0.43 (0.29 - 0.65)	1.42	0.82 (0.75 - 0.89)	0.243
												KIAA0391	9	19958	* 609947	No OMIM entry	0	0.86 (0.61 - 1.22)	0.78	0.88 (0.79 - 0.97)	n/a
												LRPPRC	5	15714	* 607544	# 220111	0	0.39 (0.29 - 0.53)	-1.93	1.2 (1.14 - 1.27)	0.055
												MFN1	9	18262	* 608506	No OMIM entry	0	0.56 (0.40 - 0.80)	1.22	0.82 (0.75 - 0.91)	0.085
												MOGS	11	24862	* 601336	# 606056	0	0.66 (0.47 - 0.96)	0.66	0.91 (0.84 - 0.99)	0.312
												NDUFAF6	10	28625	* 612392	# 618239	0	0.75 (0.49 - 1.20)	0.57	0.87 (0.76 - 1.00)	0.079
												PARD3B	7	14446	No OMIM entry	No OMIM entry	0	0.53 (0.39 - 0.72)	-0.56	1.06 (1.00 - 1.13)	0.154
												PRKAA2	10	9377	* 600497	No OMIM entry	0	0.61 (0.41 - 0.92)	1.99	0.68 (0.61 - 0.76)	0.636
												RTEL1	10	15888	* 608833	# 615190, # 616373	0	0.39 (0.29 - 0.54)	-1.15	1.12 (1.05 - 1.18)	0.106
												TYK2	6	12440	* 176941	# 611521, # 615386	0	0.4 (0.29 - 0.56)	1.59	0.84 (0.78 - 0.89)	0.497
												USP16	5	12614	* 604735	No OMIM entry	0	0.52 (0.37 - 0.75)	0.35	0.95 (0.88 - 1.03)	0.061
												WDR72	5	26790	* 613214	# 613211	0	0.84 (0.66 - 1.07)	-0.96	1.11 (1.04 - 1.19)	0.088
												ZNF259	9	13051	* 603901	No OMIM entry	0	0.62 (0.43 - 0.94)	0.73	0.87 (0.78 - 0.97)	0.147
												NCOR1	8	7672	* 600849	No OMIM entry	n/a	n/a	n/a	n/a	0.999
												PPP6C	11	9323	* 612725	No OMIM entry	n/a	n/a	n/a	n/a	0.807
												DENND4B	8	29044	No OMIM entry	No OMIM entry	n/a	n/a	n/a	n/a	0.765
												TMEM120A	7	21697	* 616550	No OMIM entry	n/a	n/a	n/a	n/a	0.112
												UBA5	11	23230	* 610552	# 617133, # 617132	n/a	n/a	n/a	n/a	0.167

## Sheet: Supplemental Table 4
Human Gene	HGNC_ID	OMIM_ID	OMIM_disease	pLI	pLI-o/e	Missense Z score	Missense Z score-o/e	Domino
ABCD1	61	300371	#300100 Adrenoleukodystrophy	1	0 (0.00-0.15)	1.87	0.72 (0.65-0.80)	n/a
AGPS	327	603051	#600121 RCDP	1	0.02 (0.01-0.12)	3.23	0.52 (0.46-0.59)	0.889
PEX26	22965	608666	#614872, #614873, PBD-ZSD	0.93	0.08 (0.03-0.37)	-0.37	1.08 (0.96-1.22)	0.089
GNPAT	4416	602744	#222765 RCDP	0.3	0.23 (0.14-0.42)	0.67	0.9 (0.82-0.99)	0.097
PEX14	8856	601791	#614887 PBD-ZSD	0.23	0.25 (0.13-0.52)	1.27	0.76 (0.67-0.86)	0.471
ACOX1	119	609751	#264470 Peroxisomal acyl-coA oxidase deficiency	0.06	0.26 (0.16-0.46)	1.98	0.71 (0.64-0.79)	0.092
PEX3	8858	603164	#617370,#614882 PBD-ZSD	0.02	0.31 (0.18-0.56)	1.19	0.76 (0.66-0.87)	0.102
DNM1L	2973	603850	#614388 ELDMPF,#610708 Optic atrophy 5	0	0.32 (0.21-0.51)	3.83	0.46 (0.41-0.52)	0.45
AMACR	451	604489	#614307 Alpha-methylacyl-coA racemase deficiency; # Bile acid synthesis defect, congenital, 4;	0.03	0.36 (0.18-0.75)	0.56	0.9 (0.80-1.01)	0.109
PEX5	9719	600414	#214110, #202370 PBD-ZSD; #616716 PBD-RCDP	0	0.38 (0.25-0.59)	0.68	0.9 (0.25-0.59)	0.072
PEX6	8859	601498	#616617 Heimler syndrome 2; #614862, #614863 PBD-ZSD	0	0.42 (0.28-0.65)	1.44	0.82 (0.76-0.89)	0.071
PEX10	8851	602859	#614870,#614871 PBD-ZSD	0	0.48 (0.28-0.86)	-0.29	1.06 (0.95-1.18)	0.053
PEX16	8857	603360	#614876, #614877, PBD-ZSD	0	0.49 (0.30-0.82)	0.45	0.91 (0.81-1.03)	0.052
PEX1	8850	602136	#234580 Heimler syndrome 1; #214100, #601539 PBD-ZSD	0	0.5 (0.38-0.66)	1.14	0.88 (0.82-0.94)	0.061
PEX19	9713	600279	#614886 PBD-ZSD	0	0.52 (0.30-0.94)	-0.78	1.17 (1.04-1.32)	0.057
HSD17B4	5213	601860	#261515 D-bifunctional protein deficiency; #233400 Perrault syndrome 1	0	0.53 (0.38-0.74)	-0.28	1.04 (0.96-1.13)	0.068
PEX13	8855	601789	#614883, #614885 PBD-ZSD	0	0.58 (0.35-1.01)	-0.3	1.06 (0.95-1.18)	0.096
PEX11B	8853	603867	#614920 PBD-ZSD	0	0.6 (0.35-1.08)	-0.31	1.07 (0.94-1.22)	0.138
PEX2	9717	170993	#614866, #614867 PBD-ZSD	0	0.64 (0.36-1.2)	0.05	0.99 (0.87-1.13)	0.101
PHYH	8940	602026	#266500 Refsum disease	0	0.68 (0.43-1.12)	0.03	0.99 (0.88-1.12)	0.062
CAT	1516	115500	#614097 Acatalasemia	0	0.72 (0.50-1.05)	-0.08	1.01 (0.92-1.11)	0.231
PEX11A	8852	603866	No OMIM entry	0	0.88 (0.54-1.49)	0.1	0.98 (0.85-1.13)	0.279
PEX7	8860	601757	#614879 PBD-ZSD	0	0.97 (0.67-1.42)	0.5	0.89 (0.78-1.02)	0.142
PEX11G	20208	607583	No OMIM entry	0	1.03 (0.64-1.66)	-0.35	1.03 (0.95-1.25)	0.081
PEX12	8854	601758	#614859, #266510 PBD-ZSD	0	1.34 (0.94-1.85)	0.46	0.9 (0.79-1.03)	0.212
Note:
gnomAD
pLI = probability of being loss-of-function intolerant_The closer pLI is to one, the more intolerant of protein-truncating variants the transcript appears to be. We consider pLI ? 0.9 as an extremely intolerant set of transcripts_
pLI-o/e = observed / expected (oe)_low oe values are indicative of strong intolerance = oe confidence interval < 0.35_tolerant (null) genes would have the expected amount of protein-truncating variation and then took the empirical observed/expected rate o
Missense Z score = Positive Z scores indicate increased constraint (intolerance to variation) and therefore that the transcript had fewer variants than expected. Negative Z scores were given to transcripts that had more variants than expected_For the miss
Missense Z score-o/e = observed / expected (oe)
Color scale for o/e: 0 to 1
	o/e < 0.2
	o/e < 0.4
	o/e < 0.6
	o/e >= 0.6
Domino
Domino score: probability of being AD_0 to 1
	Very likely dominant (0.8 to 1)
	Likely dominant (0.6 to 0.7)
	Either dominant or recessive: (0.4 to 0.5)
	Likely recessive (0.2 to 0.3)
	Very likely recessive(0 to 0.1)
ASD_Autism
CHD_Congenital Heart Disease
DD/ID_Developmental Disability/Intellectual Disability
SCZ_Schizophrenia

## Sheet: Supplemental Table 5
Human Gene	HGNC_ID	OMIM_ID	OMIM_disease	pLI	pLI-o/e	Missense Z score	Missense Z score-o/e	Domino	Geno2MP	Denovo-db	Mouse Annotations from MARRVEL
GSK3A	4616	* 606784	No OMIM entry	1	0 (0.00 - 0.15)	3.2	0.43 (0.36 - 0.50)	1	LOF in numerous	1 missense in ASD (none in controls)	Mice with improved glucose tolerance, increased insulin sensitivity, decreased fat mass and increased lean mass.
BRD4	13575	* 608749	No OMIM entry	1	0 (0.00 - 0.05)	3.74	0.63 (0.59 - 0.68)	0.997	LOF in 1 het	p.(P217del1) in ASD, p.(D231Tfs*9) in DD/ID, 2 missence in ASD, 2 missense in CHD (none in controls)	Mice with postnatal lethality, growth retardation, cataract, micropthalmia
UPF1	9962	* 601430	No OMIM entry	1	0.07 (0.04 - 0.17)	5.7	0.41(0.37 - 0.45)	0.996	n/a	2 missense in ASD, 3 missense in DD/ID, 2 synonymous in ASD, 1 synonymous in DD/ID (none in controls)	Mice with abnormal embryo development and prenatal lethality
BRD3	1104	* 601541	No OMIM entry	0.98	0.14 (0.07 - 0.31)	3.76	0.64 (0.58 - 0.71)	0.893	LOF in numerous	3 missense in ASD and DD/ID (none in controls)	n/a
GSK3B	4617	* 605004	No OMIM Phenotype entry-Associated with an increased risk for AD	0.96	0.14 (0.07 - 0.33)	2.91	0.48 (0.41 - 0.56)	1	LOF in 1 het	1 missense in ASD (none in controls)	Mice with postnatal lethality, multiple developmental defect ,cleft palate
SMAD3	6769	* 603109	# 613795-Loeys-Dietz syndrome 3	0.84	0.17 (0.08 - 0.39)	3.47	0.39 (0.33 - 0.46)	0.999	LOF in 2 het	1 missense in DD/ID (none in controls)	Mice with multiple intestinal defects, impaired growth of ovarian follicles, and develop osteoarthritis.
UPF2	17854	* 605529	No OMIM Phenotype entry-Possible link to neurodevelopmental disorders	1	0.03 (0.01 - 0.10)	3.3	0.65 (0.60 - 0.70)	0.723	LOF in 3 het	p.(S329Mfs*8) in DD/ID, 1 missense in SCZ,1 intron-near-splice in ASD (none in controls)	Mice with early embryonic lethality
WDR7	13490	* 613473	No OMIM Phenotype entry	1	0.10 (0.06 - 0.18)	2.63	0.75 (0.70 - 0.80)	0.636	LOF in 2 het	1 missense in CHD (none in controls)	n/a
BRD2	1103	* 601540	No OMIM Phenotype entry-Possible link to %608816 Juvenile myoclonic Epilepsy	1	0.08 (0.04 - 0.22)	0.5	0.93 (0.86 - 1.01)	0.474	n/a	1 missense in DD/ID, 1 missense in controls	Mice with multiple developmental defects
MTPAP	25532	* 613669	# 613672-?Spastic ataxia 4, autosomal recessive	1	0.04 (0.01 - 0.19)	1.05	0.84 (0.76 - 0.93)	0.242	LOF in 2 het	n/a	Mice with early embryonic lethality, abnormal heart morphology, muliple reproductive defects
PTAR1	30449	No OMIM entry	No OMIM entry	0.85	0.15 (0.07 - 0.40)	1.51	0.71 (0.62 - 0.81)	0.275	LOF in 2 het	1 missense in ASD (none in controls)	n/a
NRCAM	7994	* 601581	No OMIM entry	0.18	0.24 (0.16 - 0.36)	2.05	0.79 (0.73 - 0.84)	0.191	LOF in numerous	1 missense in CHD (none in controls)	Mice with multiple behaviour and neurological defects, cataract, decreased body weight
FH	3700	* 136850	# 606812-Fumarase deficiency # 150800_Leiomyomatosis and renal cell cancer	0.09	0.28 (0.15 - 0.54)	1.39	0.77 (0.69 - 0.87)	0.371	LOF in 5 het	n/a	Mice with embrionic lethality, multiple renal and urinary defects
HINFP	17850	* 607099	No OMIM entry	0.03	0.29 (0.17 - 0.53)	1.73	0.73 (0.65 - 0.81)	0.719	LOF in 1 het	n/a	Mice with early embryonic lethality associated with delayed hatching and failure of the blastocyst to expand.
PI4KA	8983	*600286	#616531 Polymicrogyria, perisylvian with cerebellar hypoplasia and arthrogryposis	0	0.36 (0.28-0.46)	3.53	0.72(0.68-0.76)	0.589	LOF in numerous	1 missense in ASD (none in controls)	n/a
BRDT	1105	* 602144	# 617644-Spermatogenic failure 21	0	0.46 (0.33 - 0.66)	0.47	0.94 (0.87 - 1.02)	0.209	LOF in numerous	n/a	Male mice with the inability to produce live offspring
USP45	20080	No OMIM entry	No OMIM entry	0	0.74 (0.55 - 1.01)	0.75	0.90 (0.82 - 0.90)	0.168	LOF in numerous	p.(Y651*) in ASD, 2 missense in ASD (none in controls)	Mice with multiple immune system defects
COQ7	2244	* 601683	# 616733-Coenzyme Q10 deficiency, primary, 8	0	0.88 (0.53 - 1.52)	-0.42	1.10 (0.96 - 1.26)	0.091	LOF in 7 het	n/a	Mice with embryonic lethality, aborted neurogenesis and abnormal mitochondria.
RFT1	30220	*611908	#612015-Congenital disorder of glycosylation, type In	0	0.77 (0.56-1.09)	0.97	0.84 (0.76-0.94)	0.063	LOF in 6 het	n/a	n/a
COQ8B (a.k.a. ADCK4)	19041	* 615567	# 615573-Nephrotic syndrome, type 9	0	0.78(0.56-1.11)	0.89	0.87 (0.79-0.95)	0.056	LOF in numerous	1 missense in DD/ID (1 missense in controls)	Mice with preweaning lethality
Note:
gnomAD
pLI = probability of being loss-of-function intolerant_The closer pLI is to one, the more intolerant of protein-truncating variants the transcript appears to be. We consider pLI ? 0.9 as an extremely intolerant set of transcripts_
pLI-o/e = observed / expected (oe)_low oe values are indicative of strong intolerance = oe confidence interval < 0.35_tolerant (null) genes would have the expected amount of protein-truncating variation and then took the empirical observed/expected rate o
Missense Z score = Positive Z scores indicate increased constraint (intolerance to variation) and therefore that the transcript had fewer variants than expected. Negative Z scores were given to transcripts that had more variants than expected_For the miss
Missense Z score-o/e = observed / expected (oe)
Color scale for o/e: 0 to 1
	o/e < 0.2
	o/e < 0.4
	o/e < 0.6
	o/e >= 0.6
Domino
Domino score: probability of being AD_0 to 1
	Very likely dominant (0.8 to 1)
	Likely dominant (0.6 to 0.7)
	Either dominant or recessive: (0.4 to 0.5)
	Likely recessive (0.2 to 0.3)
	Very likely recessive(0 to 0.1)
ASD_Autism
CHD_Congenital Heart Disease
DD/ID_Developmental Disability/Intellectual Disability
SCZ_Schizophrenia
